# Supplementary material
Source: publisher figshare collection journal article supplement (https://tandf.figshare.com/ndownloader/files/24420516)
Supplement: Supplementary file 1 [file 24420516]

channel	w_I	w_O	b_IO	b_OI	b_O	t	community
martinsellnerib	2801	15	504	1446	138	4904	0
identitaereoesterreich	55	0	0	0	0	55	0
info_direkt	193	0	0	0	0	193	0
tagesstimme	36	0	0	25	0	61	0
ein_prozent	347	0	0	15	0	362	0
identitaeredeutschland	617	0	0	140	0	757	0
alex_malenki	430	0	0	31	0	461	0
laut_gedacht	23	0	0	0	0	23	0
prototelegram	375	0	0	30	0	405	0
ruhrpottroulette	294	0	0	11	0	305	0
unblogd	1276	0	41	25	0	1342	0
chrisaresoffiziell	380	0	36	21	0	437	0
lutzbachmann	663	472	667	3654	488	5944	0
flamberghalle	70	0	0	0	0	70	0
wochenblick	5	0	0	0	0	5	0
phalanxeuropa	3	0	0	0	0	3	0
oliverflesch	256	0	0	0	0	256	0
oliverjanich	6833	55	5304	1218	459	13869	0
klemenskilictelegram	1375	1	562	36	3	1977	0
henrykstoeckl	805	0	0	43	0	848	0
beimherrmann	711	0	14	42	0	767	0
heimatgewaltfreivereint	1147	0	0	43	0	1190	0
unzensiert	5676	25	629	3716	245	10291	0
digitalchronist	1834	0	96	95	4	2029	0
ignazbearth	699	0	63	0	0	762	0
youtubestreik	206	0	0	8	0	214	0
charleskrueger	324	1	49	57	3	434	0
dions_bulletin	388	0	39	24	0	451	0
hagengrell	114	0	0	5	0	119	0
libertyacademyoffiziell	577	0	0	59	0	636	0
jungemeinung	138	0	15	7	0	160	0
kulturstudio	1188	0	131	120	6	1445	0
achseostwest	436	0	17	0	0	453	0
selbstbestimmt	115	0	0	0	0	115	0
emperorcaligula	21	0	0	2	0	23	0
krautzone	0	0	0	0	0	0	0
redpillgermany	16	0	0	6	0	22	0
expresszeitung	1150	0	93	46	0	1289	0
ukvali	103	0	0	0	0	103	0
gftv_hh	293	0	75	14	2	384	0
neverforgetnikiblog	46	0	0	0	0	46	0
evahermanoffiziell	424	0	183	53	9	669	0
betterknownow	534	0	102	71	2	709	0
dsindf	181	0	0	52	0	233	0
schrangtv	6	0	0	0	0	6	0
shlomobbing	33	0	7	0	0	40	0
gaggaland	66	0	11	0	0	77	0
pjwnews	332	22	217	725	327	1623	9
jackdawkins	15102	226	1277	27632	1614	45851	9
jennykillu	598	1	37	156	5	797	0
einzelfallinfos	4795	0	15	632	1	5443	0
insvenswelt	8128	4	518	1500	55	10205	0
connectivevents	629	0	0	38	0	667	0
qlobalchange	4686	27	1205	3018	523	9459	0
kandelkanal	759	0	30	147	0	936	0
juliajulsfrauenbuendniskandel	1183	0	0	60	0	1243	0
lisalicentia	104	0	0	0	0	104	0
marcokurz	333	0	0	226	0	559	0
videodump1	1178	20	398	1021	87	2704	0
svenliebichchat	3112	3	244	443	19	3821	0
wim4u	4801	2	737	214	9	5763	0
dbullcutter	339	0	18	63	2	422	0
taufertshoefer	140	0	29	0	0	169	0
antiilluminaten	3576	0	323	0	0	3899	0
wendezweipunktnull	1653	0	63	0	0	1716	0
legitimnews	12	0	0	0	0	12	0
markmobil	21	0	0	0	0	21	0
talawolf	7401	0	630	0	0	8031	0
juliajuls	1172	0	0	94	0	1266	0
widerstandberlin	1230	0	69	0	0	1299	0
wahrheitenorg	0	0	0	0	0	0	0
abendlanddeutschland	1067	2	101	73	4	1247	0
buergerinformative	3885	2	473	507	34	4901	0
deftiges	1375	1	83	233	6	1698	0
dornimauge	323	3	64	174	7	571	0
politaufkleber_de	43	0	12	0	0	55	0
politische_bildersprueche	1437	1	27	117	1	1583	0
afdfreundetuebingen	17	0	0	0	0	17	0
aufwachen	51	0	0	16	0	67	0
dokukiste	266	0	84	26	6	382	0
timmkellner	2	0	0	0	0	2	0
demostream	94	0	0	16	0	110	0
demostreamgruppe	297	0	3	39	0	339	0
diewahrheitundnurdiewahrheit	2593	2	893	430	100	4018	0
truelife18	40	0	0	6	0	46	0
galliadaily	10753	357	3063	9087	1806	25066	7
b_info_audio	4689	0	102	0	0	4791	0
derstramegermane	3844	15	353	1481	62	5755	0
vermisstgesucht	90	0	0	0	0	90	0
anonymousnewsupdate	0	0	0	0	0	0	0
ems_demosanitaeter_street_medic	0	0	26	0	0	26	0
mahnmalgegendasvergessen	23	0	0	0	0	23	0
mgstehtauf	8	0	0	0	0	8	0
realdonaldtrump	42	0	0	285	0	327	1
patriotnews	281	0	38	0	0	319	0
tommyrobinsonnews	5247	245	3906	4230	1824	15452	9
police_frequency	4722	3483	10865	18360	22119	59549	9
siegfrieddaebritz	245	0	118	213	20	596	0
britainfirst	5590	106	1594	4874	819	12983	9
rt_deutsch	512	0	36	0	0	548	0
gelbewesten	149	1	34	237	17	438	0
sandragabriel269	0	0	0	0	0	0	0
bellumactanews	63940	3306	36193	57059	24397	184895	7
durov	82	70	115	439	523	1229	12
politically_incorrect	10022	954	7739	8047	3608	30370	7
pnrw18	773	0	15	74	0	862	0
patriotnewz	19536	141	3217	10437	1173	34504	9
qlobalchangeusa	220	288	379	3218	5839	9944	8
nuoviso	14	0	0	0	0	14	0
europeanist	2768	4298	10829	5457	6501	29853	9
antifapublicwatch	26193	445	4862	23964	2914	58378	9
miloofficial	3437	10090	9267	20978	33209	76981	8
sargon_of_akkad	35	7	96	89	62	289	9
dannytommo	7978	32	1303	3460	388	13161	9
returnofthemark	6548	340	3626	5053	1275	16842	9
aviyeminiofficial	561	1	114	270	39	985	9
bojohnson	323	0	0	122	0	445	9
loomeredofficial	930	706	648	5306	2078	9668	8
proudboysusa	3006	3786	3781	11609	6743	28925	8
realvincentjames	9565	578	6155	7418	2787	26503	7
altnewsnetwork	6971	126	2590	4669	1094	15450	9
giukire	382	1	86	220	43	732	9
thegreatunsaid	1228	0	153	562	42	1985	9
politicalite	857	1	229	412	84	1583	9
jamesgoddard89	9058	9	1152	2144	185	12548	9
nickmon1112	1373	850	1571	5467	4631	13892	8
infowarslive	1936	15	597	1463	425	4436	9
proudboysofficial	676	336	389	3263	853	5517	8
proudboyscanada	627	1720	1449	3225	2327	9348	8
faithgoldy	637	1168	2365	1329	2353	7852	9
realgavinmcinnes	284	404	821	1053	1293	3855	8
jacobawohl	967	820	1243	4031	3121	10182	8
nickjfuentes1	1441	114	803	1397	341	4096	7
trump	11435	741	203	200754	2571	215704	1
defendevropa	15872	2568	16790	15984	10778	61992	7
unitetherightuk	6459	26	1663	1140	194	9482	9
theforbritainmovement	8671	54	1580	3563	536	14404	9
theresistanceengland	12970	89	2643	7178	906	23786	9
jaydafransen	142	0	0	155	0	297	9
stopthecensorship	9554	39	2287	3884	779	16543	9
officialmilo	0	0	9	0	2	11	9
therealityreport	21541	239	3159	18316	1819	45074	9
trtalkchris	4468	2	269	905	33	5677	9
luketrrcage	8306	94	1793	3837	428	14458	9
shaziah	2025	137	728	1095	71	4056	9
proudboysbritannia	5383	234	3601	2679	729	12626	9
enoughisenoughgbch	1393	2	285	151	19	1850	9
vinniesullivan	15006	68	1272	9216	425	25987	9
motiv8britainnews	1310	18	578	636	173	2715	9
nomoremosques	3624	14	1173	909	207	5927	9
stipple78	17556	105	6718	3384	904	28667	9
brianoflondontalks	1439	7	533	229	72	2280	9
israellycool	47	0	0	18	0	65	9
yellowvestsuk	505	0	141	142	28	816	9
vinniesullivanchat	57310	4373	37629	32399	10672	142383	9
cigtelegram	13531	41918	21588	73756	53473	204266	4
toalibertarian	11156	3484	11705	32683	26659	85687	4
demacre	1002	311	1400	1054	895	4662	7
southafricareports	2712	219	1895	3062	1557	9445	7
saffercentral	22959	869	9417	17186	4868	55299	7
thedutchoven	2609	31	1005	2511	864	7020	7
thebeastro	45097	737	14797	24981	5829	91441	7
alt_skull	96991	1598	27393	47122	9180	182284	7
pol_4chan	2565	5037	2657	14014	5407	29680	4
shitpostingfrens	5602	353	2246	5601	1370	15172	7
realblaircottrell	437	369	1430	461	686	3383	7
theenoticer	1987	23	543	1378	250	4181	7
whiteisright	17718	9183	12941	47368	20485	107695	4
beadymanor	7597	14780	11414	31071	21020	85882	4
thehundredhanders	44	209	202	149	20	624	9
thirdpositionmemesquad	61246	1398	19298	30150	6022	118114	7
nogals_redpills	17517	1756	12673	13021	5202	50169	7
sgmeme	13834	4376	9361	34355	15769	77695	4
smokesandmemes	46572	3964	24103	37045	11407	123091	7
randomanonch	54800	50495	58899	160897	102507	427598	4
nazbol	19471	7393	17539	44534	27247	116184	4
breadpilled	129430	3287	65470	60633	22662	281482	7
europelives	10350	650	5129	7707	2347	26183	7
scrimshawsaga	32573	90	4531	10242	943	48379	7
catloafnews	8748	16303	11686	29472	14663	80872	4
nationalrevival	35960	786	12352	12661	2586	64345	7
fashymemeslut	3660	184	2048	2477	769	9138	7
economichitlist	17641	207	9207	8791	3857	39703	7
coontown	25660	414	8790	11271	2426	48561	7
hansterrorwave	3273	8019	5022	12368	4475	33157	4
slovaksiege	36447	526	9592	14884	2339	63788	7
fashwave2	20486	329	6615	11242	2405	41077	7
thirdwayfashposting	15233	2759	13721	10472	4003	46188	7
thirdpositionfriendsquad	68546	1013	21189	30323	6615	127686	7
tinps	23605	129	4515	11818	1532	41599	7
bloodandhonour	2054	1146	1899	4814	2202	12115	4
terrorwaverefined	40617	225	6629	9901	1038	58410	7
hawga	70503	725	25689	27225	7264	131406	7
wuhappening	426	13	270	378	202	1289	7
thezyklonbeast	20150	659	9816	10373	3369	44367	7
uncle_paul_gtkrwn	29381	99	6170	9444	1460	46554	7
tradaesthetic	4118	13	269	1880	75	6355	7
memelab88	5499	7	305	2006	66	7883	7
westernmasculine	10633	40	850	4999	245	16767	7
faithinrace	11934	76	1676	5530	576	19792	7
neonrightmemes	4481	82	1135	1737	207	7642	7
holocaust2	16372	144	3174	5480	539	25709	7
catholicwignat	31381	523	14171	8088	2287	56450	7
exposethenose	646	32	390	266	105	1439	7
notariffs	11578	2975	16820	10800	7033	49206	7
thewhitespace	40510	1796	21631	21588	6232	91757	7
familyvalues	4012	247	1990	2349	724	9322	7
chadistan	505	974	731	2736	1799	6745	4
dadoem	1889	282	1450	3813	2501	9935	4
sarahsmirks	38537	209	9714	10629	1966	61055	7
mhz1488	4616	31	734	1904	199	7484	7
thethirdposition	21208	134	4402	5769	733	32246	7
zyklon1488	6880	186	4206	1548	411	13231	7
bowlcast333	12322	10	1553	3105	315	17305	7
untitledredpills	17948	77	2498	5328	553	26404	7
theweaponizedwest	7743	55	1981	2639	408	12826	7
clownworld2	8364	92	2022	3646	500	14624	7
genzyklon1488	16028	25	1503	3921	214	21691	7
memelabofficial	47519	747	16198	14799	3375	82638	7
corpuschristi	97	2782	252	3322	4282	10735	3
reutersworldchannel	1	0	0	159	0	160	11
wretched_westerner	40808	225	10518	9460	1625	62636	7
reyscowboysaloon	12123	287	7380	3110	1079	23979	7
truthgraphs	2781	68	1486	1129	406	5870	7
thecelticempire	11657	5987	11497	23982	13472	66595	4
tooreel5me	14200	3075	14789	17540	10644	60248	7
zyklonsdiner	53391	1243	23776	26359	8138	112907	7
overpromise_overdeliver	255	0	0	40	0	295	7
americanrenaissance	277	0	0	285	0	562	7
gasmedaddy	8844	254	6179	4148	1999	21424	7
uncle_paul1488	14603	145	4794	5599	1160	26301	7
fashwave	7208	155	1616	2489	228	11696	7
tpashitpost	38346	414	15545	10472	3117	67894	7
arbeitmachtfree	11426	43	2329	3503	525	17826	7
katomemesmith	54619	538	10150	19683	2232	87222	7
newsbeast	503	17048	409	90433	40598	148991	6
whitejesusganggang	4491	42	875	1885	218	7511	7
moonmankkk	14903	47	2103	3368	282	20703	7
radiowerwolf	1527	0	0	306	0	1833	7
markacollett	63	105	163	213	29	573	9
natsoc_me	9935	65	2208	3156	424	15788	7
thehonkushoah	19832	82	4998	4746	775	30433	7
fuckpigz	6138	45	3063	1402	437	11085	7
deathcultposting	3973	29	1515	1220	261	6998	7
nitrogenkek	4757	64	2149	1690	501	9161	7
fphate	3341	104	1203	3541	740	8929	7
dissidentgreendragon	49923	885	18678	24824	6323	100633	7
patrickcaseyusa	1743	113	1420	1251	511	5038	7
jinjerzillatoons	303	0	0	70	0	373	7
restorenaturalorder	12557	72	2886	3448	521	19484	7
sniper_tower	21644	122	5016	8176	1296	36254	7
whiteunion1962	20111	49	2287	4965	379	27791	7
memoryholed	8739	82	2307	4243	779	16150	7
josefbosch	518	0	0	245	0	763	7
josefboschchat	13772	172	5770	6105	1652	27471	7
americanfolknation	22417	22	2984	2153	158	27734	7
prowhitefam	4765	15	1382	1359	301	7822	7
ecofascistcentral	16557	80	3240	3631	459	23967	7
fraufashart	8919	1	443	882	31	10276	7
clownworldgroup	94560	1781	47047	29089	10468	182945	7
imgoingtohellforthis	1694	192	1083	1620	802	5391	7
fascistqoutes	3241	11	748	699	104	4803	7
identity_revolutionn	3352	68	1645	1473	385	6923	7
abolishlice	7645	38	1694	2717	357	12451	7
redpillvideoarchive	5766	221	1871	3294	576	11728	7
babyloncrumbling	4329	51	1883	1470	383	8116	7
nazilibrarybooks	21	0	0	4	0	25	7
fascistlibrary	19963	53	3196	3738	459	27409	7
whiteresistance	1250	254	982	971	173	3630	7
theheroicideal	1226	38	221	843	68	2396	7
seydlitzshitpost	768	6	219	156	29	1178	7
za_future_of_the_west	1907	12	280	925	103	3227	7
irelandswoes	3053	72	934	1991	451	6501	7
huwhitegoy	5424	47	2804	823	223	9321	7
thelibertyobserver	8036	1523	8914	10539	6582	35594	7
beastusfeastus	17367	262	5995	9852	2285	35761	7
bevirtuous	609	77	418	578	282	1964	7
zyklon_1488	8355	386	4187	3098	625	16651	7
ecofascist	6005	30	1071	1245	140	8491	7
zerohedge	77	27	23	1683	531	2341	8
resaxgen	15340	14164	15239	54033	32808	131584	4
pol_central_8ch	180	14	215	80	65	554	7
southern_nationalist	24144	56	6150	4813	944	36107	7
nggrz	1876	1	146	532	23	2578	7
fuhrerious88	2674	56	646	1340	176	4892	7
bravehearts88	29416	41	4212	3306	325	37300	7
boogaloointel	2495	17	862	866	192	4432	7
expresidents	2995	0	220	796	45	4056	7
miavendetta110	5217	21	603	2342	187	8370	7
cutevintage	3313	215	1845	1735	498	7606	7
antarcticarighthq	3146	6	190	646	19	4007	7
fellownationalist	13442	24	3530	1059	195	18250	7
theconspiracyhole	60	3529	242	2380	3924	10135	3
hitler_was_right	521	35	225	240	26	1047	7
scenegirlnationalism	3007	713	2065	3410	1037	10232	7
nineteen33	5361	27	630	1543	105	7666	7
ericstrikertrs	15850	177	9367	8337	4421	38152	7
hitlerart	165	0	0	27	0	192	7
accursedguardian	0	16	87	0	8	111	7
galliashare	1223	118	950	1510	619	4420	7
calisspells	4603	2	264	907	33	5809	7
prismmatic	2975	4	559	313	44	3895	7
whiteartrealm	878	0	193	86	16	1173	7
nofap_memes	139	3063	226	6134	5970	15532	3
altmemes	12210	2076	8960	20979	11723	55948	4
shitlords_inc	3018	81	1439	1745	461	6744	7
onlywhitepeoplegotoheaven	4892	80	1260	2137	349	8718	7
shitzone	5320	1332	4875	5908	2345	19780	7
fellownatchat	18454	45	6224	1503	373	26599	7
randomnconvo	24949	35368	32985	79176	55218	227696	4
europeshalllive	1569	13	478	677	159	2896	7
cutesctogoback	6383	294	3131	2860	841	13509	7
survivenow	2147	3	330	565	66	3111	7
nsi1488	46	184	47	1341	546	2164	2
wap1488	85	50	11	1698	210	2054	2
skykinglounge	4278	5	558	1477	163	6481	7
socotalks	2988	1	244	573	47	3853	7
quasargoonsqorner	314	1	46	45	8	414	7
hardrightaesthetics	2256	20	880	1035	268	4459	7
weimerica	3194	21	956	1020	216	5407	7
europelivesgroup	24239	1597	15837	14188	5968	61829	7
dieforisraelgoy	1788	1510	3263	4016	3648	14225	4
hometermia	84	1189	755	465	916	3409	4
weaponizeconspiracy	808	12717	1682	18935	20727	54869	3
atldaily	1277	3	151	617	41	2089	7
privsecgoy	470	16	404	172	95	1157	7
nickartgall	2211	8	309	477	46	3051	7
thecolumbiabugle	1568	142	1159	1518	550	4937	7
slovaksiege2	17585	84	4736	2833	509	25747	7
gay_trans_agenda	869	2224	1492	4474	2391	11450	4
tarrants_lads	4255	3	384	1237	87	5966	7
goy_descontrolado	4770	634	2617	2612	487	11120	7
cultures_of_resistance	2269	159	1096	1655	531	5710	7
erwachen	224	0	0	26	0	250	7
thewaydown	167	1852	886	1175	2201	6281	12
fashyhannah	6747	0	387	225	10	7369	7
smokd	220	1	53	103	12	389	7
multiculturalism	21	13	66	23	53	176	7
altskullmirror	7137	72	1545	3493	523	12770	7
thethirdpositionshitpost	15656	112	6857	3869	1235	27729	7
avtonom18	6330	23	1348	2839	519	11059	7
rightsight	5885	26	1416	1493	293	9113	7
ouestcasual	213	0	0	67	0	280	7
euwave	353	0	0	71	0	424	7
vdare	748	8	301	636	176	1869	7
stevenfranssen	911	68	994	709	478	3160	7
redicetv	156	31	86	134	31	438	7
thejq	3040	4	407	1169	100	4720	7
rightwingdeathsquad	1425	38	313	700	79	2555	7
sceneofhatred	928	0	0	102	0	1030	7
wotanjugend_militant	4323	16	602	698	71	5710	7
yidinfo	228	83	14	12788	616	13729	18
horrendoustrannies	1729	35	955	1604	566	4889	7
merchantmemes	161	7	119	49	13	349	7
esotericnationalsocialism	10917	0	822	1369	73	13181	7
ziegler_art	185	0	0	25	0	210	7
hackernewslive	46	0	0	122	0	168	12
hatefacts	3277	532	2339	3474	1322	10944	7
shitpostsfromthefront	450	812	2251	701	1531	5745	7
cumtown	220	46	278	204	140	888	7
aesopspitstop	319	2025	1196	1937	2943	8420	12
horrendoustranniesforum	5277	231	4188	4061	2116	15873	7
bigenergyshitposting	117	3021	962	1806	3551	9457	12
nationaljustice	19	0	27	3	7	56	7
scenegirlnationalists	8646	1272	7069	9059	4778	30824	7
emperorillustratumable	4465	73	1019	3436	449	9442	7
libertaryanchannel	2096	46	1042	981	256	4421	7
doge_edits	4222	421	2368	5260	2202	14473	4
afterlife_ht	2446	63	2736	780	600	6625	7
yellowvest	1317	8444	8289	9239	30351	57640	4
coronachannews	1249	5	818	273	152	2497	7
boomersirl	2833	2632	7005	8556	12900	33926	4
mikeenochpeinovich	0	1320	0	48691	3550	53561	23
fundamentalchristianity	13	452	72	325	727	1589	3
shitpost	2832	30	201	3529	223	6815	4
xdproductions	2814	85	1318	3385	1467	9069	4
ascendingmemes	3457	155	451	5712	575	10350	4
cuckistan	626	119	364	1864	624	3597	4
aryologia	1137	0	0	218	0	1355	7
methirdreich88	2047	1	96	191	8	2343	7
someoneneedstolead	5834	7	1793	450	89	8173	7
cig_telegram	541	21	268	305	112	1247	7
basedvideos	709	4	108	376	47	1244	7
n_cov_2019	434	12	451	192	179	1268	7
lterror_88	486	1	57	70	6	620	7
beautywhite14	2769	0	72	1288	31	4160	7
nature_and_race	183	0	0	56	0	239	7
nsrinewschannel	3758	10	993	666	120	5547	7
ssgnosis	12188	42	2523	2545	374	17672	7
cryptomaymay	3526	1044	2928	5311	2574	15383	4
weaponizedopinions	523	200	245	2531	577	4076	8
michellemalkin	751	303	1605	1163	1161	4983	7
jadenpmcneil	484	30	255	501	79	1349	7
adamicawakening	2601	4	278	863	60	3806	7
christianaryanism	2722	36	902	776	184	4620	7
thefutureofbritain	1672	259	1411	1377	427	5146	7
todayilearned	3	23	3	127	128	284	17
losa83	1177	1	45	351	5	1579	7
rapetibbygram	2115	60	660	1016	177	4028	7
witnessmeiamawaited	3163	563	3875	1787	1115	10503	7
bictors_shitpost	1155	274	509	2557	809	5304	4
internethatemachine	2012	187	1915	857	235	5206	7
applefags	6382	24	1359	1027	149	8941	7
thegoldenone	47	118	206	59	134	564	9
thejewishquestion	8518	73	2391	3067	614	14663	7
worthfightingfor_telegram	420	0	98	82	15	615	7
restorealltradition	8009	700	3897	7883	2646	23135	7
politicallyincorrectjokes	258	21	33	360	20	692	4
weebposting	580	137	645	658	427	2447	7
therealityreportchat	16284	3326	16199	14352	5404	55565	9
publicleaderboard	17639	55	1769	5282	352	25097	7
folkright	13490	150	3305	5307	795	23047	7
fashygirls	173	10	174	98	46	501	7
manoncaroniart	196	0	0	108	0	304	7
ukipkatieogr	4057	57	431	3785	137	8467	7
thesoupnazi	2522	38	1080	609	100	4349	7
bespredel_kiev	1018	1	265	170	41	1495	7
europa_invicta	355	0	129	120	39	643	7
channelcollection	13255	54	807	13629	779	28524	7
newspanopticon	9729	277	4823	7296	1696	23821	9
grapesofthorns	671	15	163	310	51	1210	7
rtandreport	815	89	189	2662	436	4191	8
brotherhoodofblood	14774	172	4585	4765	1074	25370	7
whitewolfcitadel	2692	0	82	399	11	3184	7
fashhwave	589	0	0	108	0	697	7
terrorwavebulgaria	4501	25	1874	1328	338	8066	7
terrorwaverevived	3267	46	862	593	78	4846	7
race_realism	2257	353	2341	1746	897	7594	7
resistancearts	267	0	0	30	0	297	7
nieuwshoorn	0	2346	0	3520	4577	10443	11
cyberdadafterdark	1686	23	1230	413	154	3506	7
happeningwatch	319	27	159	514	204	1223	4
thegreenbrigade	141	0	0	29	0	170	7
traditionaleurope	0	2	37	0	7	46	7
riotdogs	2086	926	2496	5566	3746	14820	12
zoomersirlofficial	0	46	119	0	71	236	7
socialismbeer	1149	955	1330	5574	4004	13012	12
memezone69	3105	1354	4161	5744	4978	19342	4
socialismbar	5917	2268	4336	20976	11008	44505	12
nationalist_channels	4113	4	168	1006	32	5323	7
lunarhorse	3205	10	1113	497	86	4911	7
redpills	211	113	156	353	91	924	4
acceleratehate	760	2	69	120	6	957	7
fk_divisionofficial	8535	46	3297	2668	833	15379	7
misanthropic_division	452	0	58	56	7	573	7
fuckingdegeneracy	4700	1039	3990	17420	9923	37072	4
puresodiumpolitics	489	130	843	347	194	2003	7
shapeshifters	247	111	192	516	75	1141	4
theiconoclast	970	2195	3756	1246	859	9026	9
realposeidon	307	24	184	301	162	978	7
thegreenpill	1642	211	877	2073	657	5460	7
bloodandsoil	134	2	71	41	15	263	7
boogalooprep	529	3	172	202	34	940	7
everyone	1205	156	725	3443	1778	7307	4
natpollsofficial	102	0	0	44	0	146	7
edelweisspropagandanetwork	1634	103	854	963	301	3855	7
edelweisspropagandamachine	35	0	0	4	0	39	7
bottomtexthere	105	4	48	36	16	209	7
wolfsschanze_1488	1122	21	628	216	58	2045	7
britishnationalsocialistmovement	2062	104	575	2043	232	5016	7
brotherhoodofblood1	21975	238	6788	7843	1815	38659	7
metacommunism	5969	3821	7531	16472	12114	45907	12
ottersancaps	1886	352	914	3312	1068	7532	4
artofchristendom	151	11	167	37	22	388	7
boogiewoogieshitmayne	27932	30	7724	3410	802	39898	7
the_nativist	3156	89	1530	1495	480	6750	7
whiteminorityreport	655	8	167	289	34	1153	7
greentextshitposting	1900	1007	1988	4453	2242	11590	4
fashpilled	771	0	48	208	10	1037	7
spqrcentral	4372	1	382	420	20	5195	7
spoonguard	178	1	44	108	10	341	7
globallyoffensive	0	63	0	1155	175	1393	20
chileanshitposts	2310	906	1661	3912	1236	10025	4
o9a_satanists_exposed	1212	51	619	963	234	3079	7
brothermillennius	98	128	155	278	112	771	4
nationalistnews	5	0	43	4	9	61	7
seydlitzshitpostchat	2188	9	572	435	92	3296	7
thethotpatrol	697	104	612	1171	533	3117	4
terrorwave	116	6	31	261	85	499	4
biggie_smallpox	1327	0	62	47	1	1437	7
modradcontent	35	0	0	8	0	43	7
straynews	0	2672	0	2098	6635	11405	12
realnazbol	20423	274	6649	11252	2874	41472	7
voiceofeurope	0	927	0	23275	8272	32474	23
ritual_murder	331	543	497	1312	553	3236	4
catholicgeneral	82	72	228	113	195	690	7
faustianecho	6014	78	2357	3082	864	12395	7
italiadailynews	0	445	9	347	189	990	21
justwhitegoyimthings	3287	62	1005	1443	284	6081	7
practicalinformation	865	7	339	388	120	1719	7
traditionalbritaingroup	213	145	305	324	99	1086	7
realsantacarla	232	3	75	55	8	373	7
catholic_sword	2555	9147	2008	34609	16847	65166	3
cousinofsleeps	3282	26	241	2581	118	6248	7
eahawhite	2049	3	462	413	70	2997	7
liftwaffle	2754	9	290	230	17	3300	7
westernmusic	224	0	25	10	1	260	7
absolutebritain	208	263	284	505	156	1416	9
chavwaffen	1274	1295	2377	2967	1121	9034	9
gangweedgaming	818	194	705	1041	493	3251	4
midwestactivism	91	0	29	51	15	186	7
volkischodina	15817	10	1919	1384	126	19256	7
bloodandsoil88	1376	1	267	135	24	1803	7
otohugh	1159	599	811	2517	654	5740	7
missgorehoundart	1401	0	117	145	12	1675	7
hammered	11946	0	4884	0	0	16830	7
vorherrschaftdivision	8153	39	2365	1957	419	12933	7
thule100	5171	3	827	294	33	6328	7
smashculturalmarxism1	172	343	315	379	6	1215	9
anonbunker	1617	356	867	1720	299	4859	7
twitterreadyvids	851	21	211	542	104	1729	7
vertigopolitixarchive	38	0	0	24	0	62	7
eahachat	8301	38	3253	1880	580	14052	7
his_panic_room	54	5879	1515	1095	12978	21521	10
thefolkschoolnetwork	1210	0	0	132	0	1342	7
solarcult	1748	0	89	262	8	2107	7
patriotfrontvideos	42	0	0	5	0	47	7
huwhitepride	6275	59	3099	2179	753	12365	7
resistinghate	12	0	0	22	0	34	9
holymemee	0	5	20	0	5	30	7
foppegb	993	20	467	269	82	1831	7
nineeleven2001	291	1	68	74	9	443	7
worstoftiktok	45	0	0	23	0	68	7
sunsetzone	932	0	26	356	20	1334	7
thegreenpilledperspective	5432	26	2025	753	183	8419	7
holohoax_memes	1107	494	1706	1136	570	5013	7
his_panic_room_chat	261	12541	1935	6189	23295	44221	10
privsecchat	75	3758	123	4610	4594	13160	3
kai_murros	273	0	17	146	6	442	7
dailywaifu	111	0	77	29	25	242	7
rightwinguk	145	151	161	567	50	1074	9
ascendingchat	2746	142	867	4386	1130	9271	4
bonedpizza	49116	5401	26097	61603	25256	167473	4
complete_anarchy	389	0	0	597	0	986	12
ancapistantm	2660	82	524	2025	286	5577	4
lauratowler	292	122	157	462	25	1058	9
canadathedailydescent	0	442	11	129	531	1113	6
thememechat	540	402	1198	576	610	3326	7
ironpills	2061	25	701	420	66	3273	7
unempatheticeuro	3895	110	2696	1737	634	9072	7
roopab	814	51	291	615	148	1919	4
westernfrontmedia	1287	2	172	419	39	1919	7
deepecology	1130	11	701	232	113	2187	7
bloodandsoil1488	5448	3	804	464	61	6780	7
interestingfirearms	81	7	80	72	57	297	7
tfwnoholograms	2778	509	1963	4754	2078	12082	4
contyteens	6709	4296	4898	16890	5156	37949	12
landslandianland	1212	69	302	1180	176	2939	4
leftism	19051	4015	9193	51816	18726	102801	12
mrboneswildride	1694	74	928	958	411	4065	4
politicalmemes	5242	4565	5994	16529	10759	43089	12
thewires	4643	260	1187	6612	1051	13753	12
thunderdom3	4312	19	1235	588	100	6254	7
antiglobalistnationalistclub	272	0	0	78	0	350	7
stackthebodiestogod555	358	0	60	0	0	418	7
telegram	149	61	27	1789	306	2332	12
dailyredpill	2588	444	2169	1851	860	7912	4
anarchomemes	8305	519	2903	11175	2731	25633	12
tptelegram	310	4	118	348	114	894	4
memritv	515	41	178	667	157	1558	4
incelstan	238	0	95	142	59	534	4
radicalshitposts	4842	1756	3169	8888	2899	21554	12
zuendels_bunker	2	86	3	232	85	408	3
thealialexander	225	184	240	768	483	1900	8
r_latestagecapitalism	516	12	128	595	144	1395	12
digital_monkey_business	832	1154	2205	3870	5675	13736	4
earthlyelementss	1525	0	225	159	17	1926	7
reddog71media	4489	58	2028	2132	417	9124	9
rwcs3	19098	8746	15503	50211	25665	119223	8
cringanarchy	104	55	259	167	298	883	4
gunsandmeat	202	0	10	95	5	312	7
theartcritique	89	0	31	2	1	123	7
invincibleunderthesun	201	9	113	107	30	460	7
riotdogsmeta	3422	2652	7100	7599	8030	28803	12
anthrx	2429	23	473	1983	350	5258	4
austwislpa	3640	264	1655	4865	1695	12119	4
meirl	52	0	0	71	0	123	4
unitedanarchistsofamerica	5991	627	2992	8835	2750	21195	12
existentialpain	8035	376	2610	6985	1736	19742	4
dottyspit	10490	96	1520	7754	1055	20915	4
memeology	325	17	266	322	209	1139	4
discordiansociety	8619	1501	5149	11401	3856	30526	12
therealhouse	26678	1335	14870	18368	8264	69515	4
mamodemeemstash	14151	1698	13064	10490	6932	46335	4
showerthoughts	144	16	130	165	118	573	4
tacuara	1228	1663	1541	2841	826	8099	4
evoliansociety	66	0	0	28	0	94	7
metaanarchomemes	29267	1334	10044	35433	10015	86093	12
unfunny	10655	397	5552	8279	3556	28439	4
inutilevitadighita	7047	3648	2031	45285	7289	65300	21
this_is_just_a_test	9243	1601	7367	13769	8248	40228	4
dreamymemes	6400	115	1715	3829	850	12909	4
afrosidemoon	309	259	61	8943	1476	11048	22
kaithrax	25242	577	5106	19395	3338	53658	4
crusadermemes	327	66	198	494	163	1248	4
weebsirl	390	52	203	518	196	1359	4
gungore	61	83	212	132	168	656	7
theinspirobot	40	37	58	103	72	310	12
reddittop	2069	62	1054	4206	2072	9463	4
gnupropaganda	60	119	200	161	296	836	7
momgaymer	0	9	12	0	10	31	7
loveandrevolution	1408	67	523	2377	578	4953	12
hentie	922	3082	1073	10178	6832	22087	21
r_pics	419	14	30	896	50	1409	4
fightingforchristendom1	1435	13	324	1272	177	3221	7
westernfrontnationalchat	8691	45	2136	2480	451	13803	7
swamplandboogaloo	1551	6	393	279	28	2257	7
the_movies_channel1	77	3	12	267	35	394	9
christiannationalism	233	2	65	62	13	375	7
boobiewaffen	5440	51	999	1908	229	8627	7
mahzins	1490	1	296	218	24	2029	7
mummyposting	32	138	130	119	111	530	4
wawaryanwoman	1553	11	395	433	56	2448	7
blackonwhitecrime	199	6	143	64	26	438	7
europeantribalism	546	0	0	20	0	566	7
bitchwaffen	2273	17	405	478	42	3215	7
celticmyths	3819	6	518	646	48	5037	7
givetendies	1060	223	926	1720	960	4889	4
white_genocide	149	949	475	1135	569	3277	4
holyleague	5721	69	2054	2399	665	10908	7
easternorthodoxchannel	101	1	22	52	6	182	7
pizzagates	105	12	92	248	140	597	7
anonposts	2	455	8	654	690	1809	16
poweredby88	1642	4	533	261	56	2496	7
waronwhites	31	0	0	20	0	51	7
fashguns	1627	0	124	255	19	2025	7
goyimses	4455	3283	3941	9907	3116	24702	4
easternorthodoxchat	575	3	118	279	54	1029	7
gabtrends	31	0	33	28	30	122	7
heidichan	238	1	29	185	17	470	7
admeme	4196	150	1141	3576	759	9822	4
war_and_media	235	1029	621	1327	1118	4330	4
leftygram	4124	198	382	6862	385	11951	12
proudlypointless	18266	2227	8392	19039	5483	53407	4
lovegulag	12275	1365	6020	12219	3971	35850	4
animuism	828	774	267	5288	835	7992	21
shit_tg_says	447	26	149	240	39	901	4
solarpunk	6463	337	2009	5118	981	14908	12
anarchobois	2199	421	899	2962	437	6918	12
mildlyinteresting	36	18	72	114	186	426	12
r_chapotraphouse	164	0	79	112	56	411	12
breadmemes	1169	82	524	909	160	2844	12
techgore	42	2148	99	2732	2634	7655	3
midgetmemes	4468	120	2162	2515	936	10201	4
syndiegram	15980	403	2566	12392	1305	32646	12
indygram	2916	42	513	3884	542	7897	12
ch1ar0scuro	138	124	326	143	134	865	12
spookbuster	1048	238	1108	1501	562	4457	12
labottegadeidankmemes	4670	138	1042	3024	432	9306	4
chaoticmemes	1372	886	1806	2106	1004	7174	12
leftistmemes	619	28	74	923	48	1692	12
humansofsdystopia	54	82	99	372	237	844	12
lovelyanarchistmemes	3334	93	625	2233	207	6492	12
anarchopirateball	453	7	129	392	53	1034	12
anarcos	7836	115	758	10403	856	19968	12
cummunistpropaganda	639	9	30	671	2	1351	12
discosoc	8660	735	4591	8241	3042	25269	12
forcefulcolonoscopy	708	47	254	1112	345	2466	4
intothesophari	476	11	219	406	163	1275	4
exitsentialpain	3581	226	2015	3146	1343	10311	4
resistanceaxisrgb	17405	434	6242	9699	2513	36293	7
theultimateredpill	809	649	1121	1157	481	4217	4
we_wuz_lernin_sheeit	399	0	264	58	26	747	7
israelwc	120	1	15	328	40	504	4
nicemanhood	580	0	48	38	3	669	7
listentruth	9	10	25	11	3	58	7
reichradio	397	1	43	55	5	501	7
patrioticchris	5177	149	675	4231	185	10417	9
ottergang	318	100	274	409	225	1326	4
fashwaveartists	14467	56	4492	881	183	20079	7
nsa88	43	263	29	1030	467	1832	2
muh_fashy_bookshelf	4	191	1	119	225	540	10
bucktheroot	126	0	63	14	4	207	7
assaultdivision88	5084	35	2003	1125	270	8517	7
ministryofpropaganda	312	0	0	10	0	322	7
breadinc	4203	422	1983	3167	559	10334	12
soygirls	395	106	584	360	300	1745	4
fuckingcancer	1259	2771	1368	13218	9494	28110	21
monroeradio	2919	4787	9188	8536	16743	42173	8
quixoticdreams	123	0	64	39	7	233	7
unhhh	5820	59	932	2716	331	9858	4
spkry_dump	1026	62	965	553	390	2996	4
marcogtv	4435	4901	2541	23889	6059	41825	21
wholesomechristians	0	6	0	1176	48	1230	20
tastymemes	7	41	17	40	37	142	4
christwave	106	14	101	56	29	306	7
nofap_chat	951	3639	1563	9480	9530	25163	3
hacker_news_feed	90	0	14	216	36	356	12
todayilearned_adfree	17	14	48	35	83	197	4
puresodiumkek	723	193	609	717	210	2452	4
redpilled_quotes	260	415	448	708	281	2112	4
rapekrieg	1174	3	139	160	12	1488	7
basedrainbowbitch	168	1124	1275	1400	4826	8793	8
bannedforlife	2229	102	1420	1482	467	5700	9
eyeonantisemitism	5628	46	1845	3982	1138	12639	9
basedrainbow	404	2011	2202	2606	7885	15108	8
silencebegins	18	49	115	39	127	348	9
theochsreport	630	266	1339	981	1225	4441	8
ampop	795	30	536	644	297	2302	7
hegelianshitting	12	831	61	571	1821	3296	19
chat_irl	6091	204	1841	6158	1561	15855	4
just_hmmm	2511	125	97	9774	195	12702	12
reddog71chewingthebone	21490	981	18648	7105	2791	51015	9
instagrampap	2685	658	3214	5333	3188	15078	9
pbchairman	631	63	226	1298	294	2512	8
ukstreetcrime	852	0	0	673	0	1525	9
ukstreetcrimechat	3414	1372	6296	2339	453	13874	9
hailhonk	1295	26	491	646	143	2601	7
canadapublic	1322	3706	3878	5378	6730	21014	8
kalexanderadams	155	1	28	108	8	300	7
whitetreeisbrowntree	535	1	69	181	15	801	7
blitzmop	118	22	45	241	21	447	7
jaydafransensupporters	6115	17	1095	2132	220	9579	9
mudonwhitecrime	346	12	281	107	35	781	7
dvachannel	1419	505	292	31216	5946	39378	13
blehautism2	163	25	146	106	34	474	7
germaniapost	152	1	36	61	16	266	7
earthlingcarl	71	12	38	60	2	183	9
geuzenbond	31	0	0	12	0	43	7
shittyocs	54	354	107	579	523	1617	4
culttture	363	180	645	897	1118	3203	8
polbreaking	2461	4	1318	935	495	5213	4
aussiesurvival	6110	20	2502	945	306	9883	7
strangerfield	760	673	2555	461	209	4658	9
marioborg20	15623	992	14975	5792	2888	40270	9
golkposting	423	5	233	167	83	911	7
amnesis	13	784	76	729	1247	2849	16
ultimatemediaarchive	944	0	53	564	23	1584	9
boomerwaffen1488	678	6	89	423	21	1217	7
poiiticamente	1487	2181	437	27987	4777	36869	17
sadmemeschannel	1608	320	1306	1967	1039	6240	4
submissive	132	1	9	162	5	309	7
stephaniechazen	308	16	207	297	77	905	7
cassandrafairbanks	8	49	81	55	51	244	7
aim_america	105	1	24	42	0	172	7
aryanconsciousness	437	0	93	152	25	707	7
nsd1488	11	33	23	142	155	364	2
swedennatnews	460	3	124	192	29	808	7
bnodesk	0	87	0	28936	283	29306	25
survivethejive	14	9	23	27	4	77	7
coomer	0	101	1	87	276	465	10
coronavchan	8	9	52	19	19	107	7
italiadailychat	0	362	0	772	512	1646	21
safferwave	79	5	22	32	2	140	7
catloafchat	1138	480	717	3441	1429	7205	4
bestmemes	1672	30	153	2214	169	4238	4
coombois	30	384	49	1176	1256	2895	10
neofolkmusiclounge	308	1	36	8	1	354	7
strengthandhonour	759	0	6	142	0	907	7
kaimurrosfans	2923	117	1485	998	211	5734	7
misanthropikmayhem	61	0	0	15	0	76	7
propogandamachine	27	0	0	11	0	38	7
anonsbunker	937	46	313	925	190	2411	7
bobpi	8	0	7	6	4	25	7
hyperbox	8538	442	1989	8505	1462	20936	4
historicalchan	144	17	48	256	60	525	7
zestymemes	678	46	70	1399	64	2257	12
nordicresistancemovement	135	0	0	28	0	163	7
magicantipatriarchy	366	18	97	274	34	789	12
guardiansofhongkong	284	66	8	9482	131	9971	5
goodgoyim	7090	20	3613	813	284	11820	7
pussypass	201	110	444	249	311	1315	7
slovideos	726	0	366	93	41	1226	7
trunews	27	0	0	9	0	36	7
jesuswarnedusaboutthem	339	1	66	114	7	527	7
jesuswarnedusaboutthemchat	1769	13	607	494	93	2976	7
legiochristi	85	1	40	65	26	217	7
mummy_general	263	239	350	525	254	1631	4
biblicaltruth	164	0	0	54	0	218	7
epiocus	9	289	25	441	798	1562	15
terrorweeb	49	257	139	466	400	1311	21
unstableswan	644	36	185	341	31	1237	12
heartwarmingmemes	878	230	625	1498	437	3668	4
solenero0	86	0	0	7	0	93	7
altknight	757	100	706	975	363	2901	9
freedomainradio	28	0	0	27	0	55	9
britishyellowvests	79	0	0	19	0	98	9
jews_did_911	323	10	199	119	31	682	7
laurenschannel	61	29	20	547	122	779	10
earthlyelementsschat	2584	3	1319	450	198	4554	7
anarcas	4497	84	935	7261	641	13418	12
isiswatch	0	11	16	0	21	48	9
anarchiaautonomia	2753	4	162	1287	68	4274	12
anarquismo	4061	0	56	6794	83	10994	12
freeleft	3437	57	616	1438	145	5693	12
lovelyanarchistmememeta	4223	85	987	2321	324	7940	12
ancapism	4722	134	1121	2515	365	8857	12
angelosart	190	0	127	30	11	358	7
christarson	78	2	52	25	9	166	7
assaultdivision	2576	7	1041	550	142	4316	7
bmscotlandawake	344	18	166	257	66	851	7
nsdapchannels	18	0	0	151	0	169	2
rwdofficial	1493	24	602	493	139	2751	7
antiantifaapw	36179	668	18903	10212	3152	69114	9
leegarrettupdates	2534	0	284	331	20	3169	9
devonpatriotschannel	5645	14	457	1991	122	8229	9
seanwilsonuk2002	2499	14	334	936	46	3829	9
predatorgroomingawareness	837	0	0	239	0	1076	9
theunshackled	89	5	8	177	8	287	9
ebanistika	177	117	36	3728	300	4358	22
image_en_lutte	1154	16	545	479	126	2320	12
mediocretv	3276	115	1120	2489	696	7696	4
justmemes	702	20	276	649	234	1881	4
foofsmemes	23	0	0	16	0	39	4
waytoolong	592	0	24	359	15	990	12
the_onion	0	15	0	1989	248	2252	1
zestycommiememes	1469	68	390	763	69	2759	12
jpfugcpfem	213	0	25	157	13	408	4
volkischslava	3258	0	189	146	5	3598	7
americanns	1701	2	194	110	6	2013	7
nauala	233	16	227	107	86	669	7
tgshepherd	496	18	672	291	180	1657	7
assembly_woman	155	73	142	353	115	838	4
indianpeoplefacebook	1275	36	319	806	154	2590	4
irishknowledge	8	8	18	12	8	54	7
unmiserableanar	3092	14	1193	1007	287	5593	12
oinkcoin	459	19	109	518	45	1150	12
get_happiness	16	14	7	88	22	147	12
spliffs	29	0	30	4	4	67	7
stirnergang	28	921	58	1195	1985	4187	19
grouchysocialists	0	0	0	0	0	0	12
megasmoistmemes	62	64	42	626	198	992	19
techgorechat	492	4737	340	20824	8403	34796	3
landslandianchat	3492	639	1680	5154	1589	12554	4
bloodwars	6	0	0	1	0	7	4
animeirl	648	17	133	270	29	1097	4
cheemsedits	196	15	55	415	76	757	4
sangheliosstash	262	0	21	117	7	407	4
islammemes	1120	58	428	907	231	2744	4
basededucation	685	45	568	347	221	1866	4
groomingawareness	22994	328	11838	2999	777	38936	9
northeastinfidel	175	0	14	152	9	350	9
xxplwxxchannel	1707	1	223	224	17	2172	9
jaydafransensupporterschat	22997	642	15300	6522	2262	47723	9
conservativeharmony	7878	4	733	1376	89	10080	9
ukstreetsoldier	2942	4	495	807	50	4298	9
thecarnalconservative	9465	230	7539	3806	2403	23443	9
daveytrumpnews	49	0	0	7	0	56	9
dflatwas	61	0	0	10	0	71	9
antimerchantsquad	894	1	144	222	28	1289	7
blackshirtlegion	879	0	66	374	18	1337	7
alternative_news_group	13201	1375	16799	6650	5010	43035	9
ultimatememestash	330	3	314	134	95	876	9
secoastaldefence	418	1	60	63	2	544	9
destorythesoy	1749	0	31	1243	17	3040	9
glennteale	648	0	84	122	10	864	9
redpilldragon	204	321	399	613	440	1977	8
thegoyimknows	1804	7	274	628	62	2775	7
owen_shroyer	68	0	0	109	0	177	9
yanggang2020	160	8	103	214	89	574	4
zoomernat	608	1	81	242	11	943	7
nsaction	187	0	0	12	0	199	7
calsibotdev	4	15	12	40	81	152	3
indoeuroway	306	13	98	144	21	582	7
deplorabletrumpster	154	110	162	646	330	1402	8
dailygroyper	249	10	37	269	20	585	7
erobols	374	66	268	475	229	1412	4
pepesnutritionalsuplements	534	16	224	293	56	1123	7
antifamousec	120	98	138	325	108	789	8
politicalkathy	32	8	61	94	44	239	7
mwpublic	379	110	297	436	77	1299	9
patrioticchat	5106	388	2008	3711	392	11605	9
candaceowens	448	43	29	2745	39	3304	1
cosmotheism	120	1	28	13	1	163	7
whitepilled	1116	48	789	858	469	3280	7
christianfurriesonly	8908	40	1665	2579	450	13642	4
keiohmeme	1741	33	980	710	311	3775	4
sickipedia	40	0	0	46	0	86	4
peterboykin	1130	44	1004	703	464	3345	9
alsangmoore	2079	1	480	298	34	2892	9
libertyshill	415	1509	1973	3569	12224	19690	8
cutehappystuffs	2418	82	599	1166	197	4462	4
antifaallstars	5302	158	1350	6818	1386	15014	12
notactuallyfunny	144	53	200	210	140	747	12
ecoboys	65	57	171	98	137	528	7
hl1shitposts	3	23	8	34	49	117	3
warmasterhorus	582	223	781	474	108	2168	9
sheenaparks	816	44	577	427	81	1945	9
keith_woods	0	0	5	0	3	8	7
familiesdestroyedbythestate	5028	0	306	338	12	5684	9
tomenglish1	372	0	0	21	0	393	9
leegarrett	3757	16	685	1158	105	5721	9
unitynewsnetwork	372	0	17	60	5	454	9
activemancstreamz	6082	3	930	591	44	7650	9
familiesmatter	2991	0	57	127	2	3177	9
whodareswins2	2456	4	681	206	29	3376	9
alexjoneschannel	168	0	41	129	26	364	9
brexiteers	13127	13	2662	1936	272	18010	9
thelittlelioness	831	0	122	69	5	1027	9
liamwalsall	1421	3	282	270	33	2009	9
g3news	119	9	93	90	48	359	7
wakeupuk	217	0	0	33	0	250	9
minervafreedom	326	41	289	865	462	1983	8
patriotictalk	68017	3120	36724	22260	6515	136636	9
identitariansgb	358	2	52	229	21	662	9
thenotoriousmcv	6	0	0	3	0	9	7
trumpjr	4512	102	121	18850	332	23917	1
potus	8511	25	88	31338	261	40223	1
foxnews	32	0	0	82	0	114	1
blackmalewhitefemale	18	96	54	167	153	488	4
pwmd1	672	20	178	317	31	1218	7
fuckyourfeels	11833	304	7709	4086	1732	25664	9
mediabritain	21933	21	10215	1710	466	34345	9
politicsdebate	20303	156	20989	2250	1263	44961	9
mbnews_uk	3104	2	267	238	15	3626	9
groominggangsawareness	260	0	0	18	0	278	9
britrevuk	169	0	0	7	0	176	9
warmasterhoruschat	5000	607	6539	1651	523	14320	9
nymphonews	0	5	3	45	23	76	8
realpeterboykin	3192	362	4742	2529	1931	12756	9
antiwhitelgbtagenda	8758	31	7580	1314	664	18347	9
trrchat	28995	96	19082	3359	1516	53048	9
patriotsallianceuk	3184	1	346	149	7	3687	9
grimjohnothereaper	1240	0	311	62	8	1621	9
fascistbooknewsandmedia	6671	6	1750	423	72	8922	9
basedamynews	58	0	0	15	0	73	9
katiejayne	817	0	0	11	0	828	9
mofyaz	197	0	0	17	0	214	9
freemelaniechat	3773	0	130	123	3	4029	9
snowshadowpoems	0	56	26	0	3	85	9
wakeupuk_group	4048	5	1025	369	35	5482	9
fosau	225	1	68	51	8	353	9
patrioticcrusader	1832	2	314	71	5	2224	9
exposingrh	2062	1	107	303	9	2482	9
audionook	1005	6	548	183	43	1785	9
exposingculturalmarxism	1209	43	473	948	100	2773	9
basedvidsnpics	2771	18	4351	204	104	7448	9
antiwhitewatchtrr	4094	50	5479	562	203	10388	9
comfortandsmugness	3504	4	1922	260	54	5744	9
redpillpics	1617	3	2258	123	78	4079	9
theharmonychat	4814	39	4476	149	22	9500	9
steetcrimechat	107	4	77	218	9	415	9
religiousdebate	4910	27	4001	485	183	9606	9
stop5gchannel	202	2	59	149	11	423	9
devonpatriots	6476	52	1061	1518	116	9223	9
videoonlysharegroup	625	2	554	59	4	1244	9
reddog71thedoghouse	4561	0	5689	271	143	10664	9
therightwinggroup	7374	18	7774	163	58	15387	9
picsonly	497	1	274	13	2	787	9
sportchattrr	495	0	88	0	0	583	9
rdbathiests	666	0	711	16	1	1394	9
historyasweknowitchat	384	3	184	55	2	628	9
magafirstnews	3960	282	3514	2947	1479	12182	9
thebeautyofnature	2898	0	43	355	5	3301	9
revelationbedamned	175	0	0	51	0	226	9
childrenmatter	5201	1	767	112	10	6091	9
realnewsukchannel	159	0	49	64	8	280	9
theartistsarchive	600	0	38	49	3	690	9
westernculturegeneral	619	2	159	262	16	1058	9
streetcrime	29	0	22	66	3	120	9
historyasweknowit	42	0	0	10	0	52	9
tpusa	3613	42	81	10309	151	14196	1
swhkdemocracy	3625	656	377	68481	5438	78577	5
photographersarchive	1335	0	0	35	0	1370	9
brexiteerschatlounge	28801	111	9787	3175	726	42600	9
proudboysaustralia	66	209	221	333	259	1088	8
dbongino	5510	41	236	11970	395	18152	1
steven_crowder	717	28	30	2811	51	3637	1
trump_supporters	1153	380	1236	3614	1421	7804	1
educatingliberals	640	23	54	2057	101	2875	1
real_donaldjtrump	6779	9	41	14810	70	21709	1
charliekirk	1099	0	15	3405	36	4555	1
realbenshapiro	2656	28	131	6795	261	9871	1
proudboyspdx	184	357	535	591	450	2117	8
thewatchmen777	472	10	73	436	45	1036	9
greatawakening	3441	343	68	167148	2861	173861	1
britainfirstchat	4671	57	2897	1467	612	9704	9
liveuptofreedom	1605	108	1210	632	231	3786	9
soph_sewernugget	388	26	301	238	87	1040	9
jploubriel	70	72	754	68	295	1259	9
womenwaffen	131	169	451	374	129	1254	9
daughterofalbion	4	0	0	3	0	7	9
eirefirst	735	248	698	1293	448	3422	7
shitlordsorg	5381	181	2739	3641	1179	13121	7
dumpitydoo	0	0	20	0	10	30	7
itsoktobewhite_uk	15	18	39	43	31	146	9
warpigmemes	1242	37	458	585	146	2468	7
niggazbkissin	1403	5	272	345	43	2068	7
nazgoth	32	0	0	14	0	46	7
fopsgentlemensclub	419	0	0	118	0	537	7
dasvolkdesnordens	2077	4	833	320	83	3317	7
wainola	137	0	0	15	0	152	7
patrioticgroypers	121	0	0	121	0	242	9
patrioticweeklyreview	4982	3403	7742	5956	2562	24645	9
alpinepost	40	2	62	16	33	153	7
nsmmedia	756	2	91	428	43	1320	7
paganwaffen	409	0	0	177	0	586	7
freespeechonfirechat	28	667	70	673	1136	2574	10
freespeechonfirechannel	6	409	40	114	679	1248	10
nationalsozialistische1488	26	45	14	294	61	440	2
nazboom	1	10	28	5	11	55	4
offaofangeln	3604	4	724	449	44	4825	7
bstproject	1108	7	176	260	22	1573	7
thecq	1356	0	65	121	4	1546	7
morememes2	392	23	364	126	81	986	7
orthodoxchristianperspective	99	1	28	20	6	154	7
squadsquadsquad5w	859	63	745	208	48	1923	9
moddedcentral	1714	1	86	467	21	2289	7
nrmchat	20106	211	8054	2790	641	31802	7
whitetreealliance	10	0	0	1	0	11	7
groypergangposts	341	19	275	261	139	1035	7
jfgariepy	188	0	95	83	38	404	7
espcitadel	254	11	140	131	63	599	7
revolutiontalk	2510	224	319	22733	2392	28178	22
revdiachat	2080	724	339	19287	1693	24123	22
black_rose_chat	579	163	65	8874	571	10252	22
parisburns	3658	671	589	14755	867	20540	22
azat_solidarity	452	3	9	4908	98	5470	22
skovoroda	525	0	20	3131	72	3748	22
nemanideni4ogo	1045	55	101	7671	505	9377	22
r_channels	6001	163	448	19610	1147	27369	12
unitedcelts	49	310	67	542	230	1198	4
frontedellatradizione	156	0	19	48	1	224	7
vexillology	362	23	64	642	85	1176	4
brazilianinsurgencycomrades	915	24	383	339	86	1747	7
realdailywire	2473	12	43	4008	41	6577	1
prager_u	2195	37	126	4863	199	7420	1
germaniapostchat	746	13	543	510	348	2160	7
coronaviruschina	0	1	2	0	13	16	16
zyklonbslidingdoors	234	0	15	108	4	361	7
irishpatriots	202	3	86	67	10	368	7
orlaredchan	32	0	4	12	0	48	7
canis_channel	0	343	0	3797	3060	7200	1
donaldjtrumpjr	198	0	0	242	0	440	1
groyperdragon	325	348	665	889	957	3184	8
veregala	25	1	11	16	4	57	4
alt_center	437	1209	1878	2652	8011	14187	8
christianity_8ch	651	1692	1117	2834	2085	8379	3
kulturgalerie	0	0	3	0	15	18	0
dasvolkdesnordenschat	2087	2	1526	330	211	4156	7
annechan	30	17	32	43	25	147	7
bunkerdayly	402	35	98	5340	1032	6907	22
primordialpath	31	25	9	157	2	224	9
thefascifistchannel	45	0	11	15	4	75	7
shit_posting_memes	54	0	1	51	1	107	12
brazilianpol	1080	119	431	1456	333	3419	7
kaliyugasurfingclub	681	2	151	40	3	877	7
antiwar	333	23	188	300	130	974	7
vsrataya_zhurnalistika	345	10	391	164	169	1079	7
openrussia_team	149	0	0	2408	0	2557	22
randaobr	3710	1425	820	34462	4947	45364	17
laborwavechannel	185	12	81	94	11	383	12
thekittyhouse	2496	38	891	1509	439	5373	4
cursedposting	217	6	53	182	36	494	4
blessedposting	94	27	49	127	33	330	4
rand2ch	7	10	11	242	186	456	13
wholesomeuwu	1111	4	186	571	86	1958	4
tor_til	0	0	1	0	39	40	11
hkstandstrong_promo	1510	35	13	14307	81	15946	5
traaaaaaannnnnnnnnns	474	56	52	3807	341	4730	21
xtruthteller	46	0	0	0	0	46	9
christcore	107	0	6	8	0	121	7
theworldview	863	3	140	1141	203	2350	4
romanovworld	174	0	0	30	0	204	7
meineehreheissttreue	103	0	0	29	0	132	7
orthodoxchristianjokes	44	0	0	11	0	55	7
redeyedrant	171	0	9	5	0	185	9
lonbenjaminmemes	1674	190	1313	1098	356	4631	12
communalism	176	1	69	32	3	281	12
mcmlxxxivwasbetter	746	59	306	593	115	1819	12
notanaltankism	2230	256	799	3589	879	7753	12
cringeoftheday	26	0	0	13	0	39	4
based_amynews	667	2	482	115	38	1304	9
nowhiteguiltalerts	28	0	0	24	0	52	7
alexandersangmoorechat	1531	0	975	0	0	2506	9
naturalsyriageneral	94	14	8	221	1	338	4
orwellandgoode	0	6	14	0	5	25	9
newsworthtelling1	4486	0	3388	0	0	7874	9
stop5gchat	4821	3	734	1022	93	6673	9
redeyedrantchat	1010	2	228	32	3	1275	9
saveusnow	419	0	269	0	0	688	9
ryanmacpherson	160	1	118	20	6	305	9
secoastaldefencechat	116	0	98	13	5	232	9
proudpatriotschannel	1767	6	991	181	38	2983	9
ru2chnews	987	261	246	11363	2496	15353	13
foxesinc	1240	270	1024	814	241	3589	4
redmemesofmars	542	259	553	925	135	2414	12
surrealmemes	0	15	0	425	94	534	20
shitposts	9	0	0	10	0	19	4
memeselection	54	0	0	22	0	76	4
prolifegang	443	68	215	580	131	1437	4
aurelioramirez	17	59	23	75	32	206	3
patrioticgroyping	1751	137	1185	590	109	3772	9
milofans	209	377	886	640	1184	3296	8
theralphretort	17	13	21	65	61	177	8
readmorefgt	924	1	327	41	6	1299	7
antifaunmaskeduk	223	0	6	12	0	241	9
catholicnazi	239	0	40	27	4	310	7
andysaxon78	16	0	22	0	1	39	9
millennialwoes	29	17	22	38	3	109	9
littleenglandisours	21	0	0	11	0	32	7
realdonaldtrump_bytwitter	0	108	0	57528	744	58380	1
tuckercarlson	33	0	0	63	0	96	1
lgbtrump	94	31	87	216	142	570	8
niggerfagot01279	971	0	378	108	30	1487	7
accelerationcoalition	44	2	162	4	10	222	7
ydwdy	240	38	167	340	124	909	12
outlawcommunists	134	3	16	72	6	231	12
goldfinshes	129	79	70	433	136	847	4
infowarsnews	359	1	73	194	38	665	9
groominggangspredatorawareness	880	0	85	95	5	1065	9
borderwar	5	6	24	4	1	40	7
gnumeme	65	22	51	98	35	271	4
viking_house	168	0	0	14	0	182	7
system1488	171	0	0	0	0	171	7
viking_house_chat	4547	1	1362	319	89	6318	7
covid19update	2	0	0	14	0	16	3
invictus_portucale	6	0	0	5	0	11	7
thespanisharmy	29	0	3	108	15	155	4
drdavidduke	0	67	0	1672	216	1955	23
westerncivilizationrenaissance	1844	58	1593	651	318	4464	9
daily_caller	4933	29	212	7951	288	13413	1
ashleasimonnews	198	0	19	0	0	217	9
theresistanceenglandchat	6745	80	3078	1578	445	11926	9
activepatriotstalkgroup	545	4	146	201	18	914	9
czechmaffia	7	0	0	5	0	12	7
patriotsalliance	6281	9	2143	268	71	8772	9
fathersfailedbythestate	519	0	9	19	0	547	9
styxhexenhammer666channel	9	10	11	87	90	207	8
shadowman2020	89	2	55	4	3	153	9
danielproudjew	58	0	0	6	0	64	9
shrimpniggasunited	595	1	46	224	17	883	4
furryee	6358	15	199	3479	91	10142	4
methiewshitposting	4233	1192	1345	11472	1586	19828	21
milkyshitpost	962	61	633	308	120	2084	4
legoyoda	272	122	439	273	236	1342	4
ventooreo	2503	87	447	1651	184	4872	4
furrymemes	2189	13	122	937	39	3300	4
shitliberalssay	7	35	14	26	4	86	4
nationalistgirls	5	0	0	0	0	5	7
fucksts	122	6	49	121	32	330	4
retrodump	137	30	84	369	111	731	12
randompix	221	2	48	44	8	323	4
aryanspirituality	418	0	27	22	1	468	7
theoldways	136	0	47	17	2	202	7
oakwisebecoming	579	0	32	50	2	663	7
aistija	298	1	23	20	0	342	7
funny_monkey	345	206	567	457	371	1946	7
rosiepooshakenbake	104	27	95	290	169	685	8
donkamatic	289	46	132	316	88	871	12
order_15	88	0	0	13	0	101	7
odept	0	5	0	453	113	571	22
alleyesonislam	675	3	192	173	29	1072	9
dividedbyzir0	3344	735	2756	2714	993	10542	12
smolville	766	134	444	876	195	2415	12
naturechan	430	325	388	1228	546	2917	7
mutopnbgalactica	911	2	228	171	34	1346	12
googlefactss	611	0	0	679	0	1290	4
hugfest	2572	128	1673	900	288	5561	12
classicalartmemes	551	82	279	631	215	1758	4
healthymemes	17	28	58	30	16	149	12
nproductions	462	2	92	153	22	731	4
brokencats	1317	8	220	1068	169	2782	4
onkyokei	226	0	0	45	0	271	12
trrsport	85	0	0	0	0	85	9
radchan	165	0	15	198	17	395	4
groominggangspredatorawarenessuk	146	0	7	25	0	178	9
coronaviruschinachat	40	1	6	199	20	266	16
christogeneaarchive	17	0	0	3	0	20	7
architecturearchive	379	0	0	15	0	394	9
qanons_usa	404	352	322	3855	2948	7881	8
foxandfriends	11	0	0	16	0	27	1
dancrenshaw	1100	1	55	1413	51	2620	1
brianharveye17	0	0	0	0	0	0	9
chesnokmedia	169	12	22	7643	1251	9097	2
otterganggc	145	116	86	620	202	1169	4
r_todayilearned_channel	0	0	16	0	16	32	4
antitradpics	8	19	23	43	38	131	4
referencesforfuture	17	99	55	71	109	351	4
memelabnews	91	34	174	90	84	473	9
pwmdrestart	1021	25	242	652	93	2033	7
cigtelegram2	18	1431	78	493	683	2703	4
basednickers	2711	90	1288	1927	577	6593	7
groypergang	10146	335	5473	8462	3369	27785	7
twitter	132	0	0	242	0	374	1
racerealism	412	0	18	54	1	485	7
aussiesunited	1108	530	3178	1193	1591	7600	9
england_chat_group	0	217	0	9596	53	9866	24
nomoremosqueschat	4305	21	2665	335	109	7435	9
pissedoffpatriot33	155	0	6	0	0	161	9
prpanah	164	206	98	691	194	1353	4
hizballah	248	7	10	3345	114	3724	8
trumpchannel	35	0	0	68	0	103	1
trumpstudents	3907	0	15	2632	10	6564	1
spbchannel	94	0	0	0	0	94	7
diversitymachtfrei	32	0	14	5	1	52	7
incel	129	172	278	408	518	1505	4
twochannel	2137	354	310	31579	4336	38716	13
mytrapcard	5796	91	1453	3657	793	11790	4
shrimpniggas2	323	0	85	94	25	527	4
thingsgayfurriessay	519	7	62	211	20	819	4
esoteric818	209	0	0	20	0	229	7
hopenothate	0	312	0	3113	250	3675	1
peter	28	0	0	1	0	29	9
legiochristichat	86	0	33	107	38	264	7
saintharrison	41	83	32	295	59	510	7
arktosmedia	5	0	0	0	0	5	7
mickeymouseshoothouse	9	0	3	3	1	16	7
lostboyevsky	822	47	87	1169	57	2182	12
rebelwords	5358	298	966	19124	2687	28433	22
username	0	0	0	0	0	0	7
njeha1	78	0	35	26	2	141	7
charliekirk11	39	0	0	39	0	78	1
freedomspeach	220	0	62	0	0	282	9
sonsofcolumbia	23	0	0	7	0	30	7
hellenicmythos	390	0	0	60	0	450	7
aggychannel	2242	26	281	654	53	3256	4
joebiden	14	0	0	16	0	30	1
frankfurtschoolgirlshitposts	84	663	599	398	1329	3073	19
the_shithouse	157	137	147	905	491	1837	19
bunpile	55	91	31	920	388	1485	21
emptyclips	20	51	6	846	184	1107	17
aestheticc	141	90	108	442	226	1007	4
indoeuropean	9	0	0	3	0	12	7
laurenschanneldiscussion	365	372	186	2409	806	4138	10
jakelloyd	70	0	35	38	13	156	7
ps752	16	0	0	32	0	48	9
magyarhir	73	0	7	37	2	119	7
based_screencaps	144	48	98	178	39	507	4
christopher_cantwell	347	0	46	27	3	423	7
cantzuckus	13	4	8	11	0	36	7
cantzuckgroupchat	590	34	216	382	38	1260	7
purble_place	91	8	27	142	24	292	4
bowlcast	249	0	7	46	0	302	7
news4achange	23	3	8	52	8	94	7
laptelegram	211	86	251	374	165	1087	12
voregeoisie	517	2	180	108	34	841	12
maymay_review	77	10	16	130	15	248	4
thisiszeronews	62	0	12	0	0	74	9
theunionuk	106	0	0	8	0	114	9
daniellestella2020	18	92	16	639	394	1159	1
goylilla	0	20	0	0	21	41	4
unwashed2020	7	1	2	4	0	14	9
groypingstreams	15	0	3	0	0	18	9
dissidentaction	11	2	7	22	1	43	9
potatosmasher	72	0	4	12	0	88	7
furriesexposed	1436	169	74	9361	256	11296	12
thetweetofgod	94	0	0	42	0	136	7
aviyeminichats	4522	319	2892	4076	1410	13219	9
socialpurge	11	0	0	11	0	22	9
endforcedadoption	319	0	0	0	0	319	9
forbrit	4937	7	6992	467	414	12817	9
programmer_humor	314	15	96	355	70	850	4
thegreenabyss	1281	72	628	447	79	2507	12
trcproductions	635	10	51	294	12	1002	4
seffssanctum	333	5	171	136	60	705	4
argentinageneral	988	93	216	1473	200	2970	4
gopleader	28	0	0	26	0	54	1
kgmeme	191	6	75	144	33	449	4
weebthings	96	27	26	241	40	430	21
folkwisdom	134	0	0	12	0	146	7
polchartsrepository	0	0	0	0	0	0	7
videosnsheeit	7	114	106	55	145	427	9
serenaposts	231	139	178	708	264	1520	7
hinduismandodinism	595	0	54	27	2	678	7
subtleskeptics	124	0	35	55	5	219	7
fashwaveresources	158	0	0	6	0	164	7
birdgifs	45	6	32	41	20	144	4
beatwomen	3589	1118	2556	5078	1894	14235	7
animemerepo	622	35	246	373	87	1363	4
natandtrad	515	3	238	98	35	889	7
danwallpaper	132	12	21	330	35	530	4
memes_bunker	3011	294	2051	2319	999	8674	4
epiocus_group	5	74	8	140	220	447	15
egonchan	147	100	195	236	156	834	4
erbfans	966	279	963	1162	569	3939	7
fuckingwhitefox	15	45	11	115	54	240	4
invictusmaneo2077	357	0	61	227	19	664	7
dprknews	0	7	8	0	5	20	7
ahcenter	7	8	6	67	38	126	2
tgbeta	751	36	82	4352	483	5704	12
unfilteredanduncensored	672	66	380	792	268	2178	7
witchesprimer	81	3	19	59	2	164	12
cyanurelaughter	1448	16	227	446	29	2166	12
leonestunmarindeaudouce	914	10	243	164	21	1352	12
lunargram	419	4	234	100	25	782	12
dox_tranny_storytime	232	1	89	33	4	359	7
naweedsvalley	32	0	0	20	0	52	7
sharonhardingleeds	103	0	0	0	0	103	9
southernpovertylawcenter	21	0	0	24	0	45	7
griptmedia	13	0	0	11	0	24	7
catenaaurea	41	257	52	474	377	1201	3
nazbol1	10	0	0	26	0	36	4
ultimora	46	0	0	89	0	135	21
moloko_plus	3176	170	598	5443	302	9689	22
youregay	2651	27	421	852	95	4046	4
colinsharkstuff	20	173	11	272	44	520	3
barsarkarna	505	0	100	0	0	605	7
churchofracism	129	0	0	86	0	215	7
oakwhispers	685	0	152	68	10	915	7
folkishfrance	312	0	0	48	0	360	7
pdfchan	0	0	13	0	10	23	7
terralogos	641	8	345	562	237	1793	7
pleasingaesthetics	42	0	20	14	5	81	7
chrisdoyle	717	0	152	0	0	869	9
ukrainiansichsociety	22	0	3	4	0	29	7
exposeextincrionrebellion	279	0	36	61	5	381	9
newsworthy1	1299	0	936	0	0	2235	9
themightykafirs	492	0	41	23	0	556	9
europeanaesthetics	1276	0	129	58	6	1469	7
thewrongberet	404	2	136	23	3	568	9
britpatriots	1858	9	720	205	36	2828	9
britishpatriotnews	195	0	0	26	0	221	9
tommyrobinso	15	12	17	17	1	62	9
mayrakag	413	308	1044	685	784	3234	8
southernpatriot	68	13	154	93	142	470	7
whlibrary	308	0	7	55	2	372	7
paganatiodinism	162	0	0	14	0	176	7
makefreedoms	209	0	9	64	1	283	7
flecktarnoc	29	0	0	9	0	38	7
patriotsdiary	39	0	0	0	0	39	9
ciaosonokirby	3366	442	559	7093	459	11919	21
supisupi	443	356	344	1400	446	2989	21
r_sbubby	40	1	0	192	9	242	21
gxvnet	1039	19	784	332	102	2276	9
itsokaytobewhiteandright	28	19	182	8	3	240	9
oknodai	952	305	361	2749	458	4825	21
abacate_ancap	368	473	125	5597	1432	7995	17
volkdeselfenwaldes	1494	6	377	150	10	2037	7
volkdeselfenwaldeschat	499	0	35	58	2	594	7
runicdivination	1032	0	78	61	3	1174	7
hyperboreanreflections	593	3	112	102	5	815	7
teutonaesthetic	46	0	0	0	0	46	7
somewhithersawesomestuff	2037	40	682	640	135	3534	12
gingersrant	1109	0	57	85	5	1256	9
ukfreedommovement	63	0	0	0	0	63	9
akhandbharath	0	65	0	539	351	955	8
fandom_hell	733	24	328	338	107	1530	4
altfurmeme	1966	77	1216	2586	1262	7107	4
wobbliechannel	97	0	5	38	0	140	12
titansofliberty	226	44	170	391	103	934	8
survivingweimerika	177	0	9	25	0	211	7
esotericteachings	151	0	23	0	0	174	7
germanphilosphers	39	0	17	0	0	56	7
ihatemylifesoipostironicmemes	0	337	0	1030	833	2200	17
markbutler	110	0	142	0	0	252	9
pussypatrol1488	394	10	105	147	8	664	7
vibecast	1012	4	165	484	64	1729	4
vibecastchat	83	2	26	43	4	158	4
johndeemeta	290	34	143	197	41	705	12
johndeesdankmemes	58	14	48	44	10	174	12
thingsofmemes	76	0	0	26	0	102	7
enigmaticanimedump	30	3	23	29	19	104	7
wignatallstarsentertainment	145	0	43	41	6	235	7
existentialcomics	99	0	0	53	0	152	12
fishtankk	272	0	29	72	6	379	7
communismkills	16	8	29	15	10	78	8
medtakes	673	18	126	714	71	1602	7
mikostation	58	0	7	23	2	90	7
ironawakening	332	0	40	0	0	372	7
gdl4life	34	0	0	8	0	42	7
generationidentitaire	13	0	2	165	21	201	2
generationidentity	0	0	9	0	7	16	7
weltkriegwave	47	0	3	42	1	93	7
transgendersafeplace	18	0	0	8	0	26	7
ultimora24	1639	25	111	1661	91	3527	21
exodusamericanus	30	0	18	0	0	48	7
theprot	12	0	0	11	0	23	12
gatti_rotti	239	22	89	198	45	593	4
asranarshism	2601	0	38	410	6	3055	12
geogram	36	3	9	52	6	106	7
cozycabin	2285	35	1317	481	191	4309	7
antiterrorcrusaders	0	48	0	23249	2109	25406	25
nationalrevival1	0	0	0	0	0	0	7
jewishnews	309	50	35	4815	434	5643	18
noisereich	149	0	3	4	0	156	7
miamiproudboys	152	10	53	130	26	371	8
phillypb	16	0	2	12	1	31	8
brienjames	94	68	226	335	320	1043	8
realjenloh	515	71	1036	351	287	2260	8
demandfreespeech	176	38	243	201	156	814	8
oaknation	20	5	79	14	25	143	8
benshapiro	8	0	0	14	0	22	1
kemostar	819	3	64	566	44	1496	4
hoursdumbmemeshit	20	10	9	46	1	86	4
emaccs	1331	206	784	1581	506	4408	12
bloomingdump	0	1	19	0	1	21	12
thehimalayas	175	0	38	14	2	229	7
nazbolnow	1	0	0	2	0	3	4
danelymail	6	0	0	7	0	13	7
copy_left	94	0	0	25	0	119	12
tomrum	32	6	24	63	47	172	7
narcissists	58	5	43	50	25	181	4
raidfest333	698	2	666	149	117	1632	7
deepsouth88	0	0	0	0	0	0	7
dogpics	20	44	7	145	4	220	12
too_thanks	0	12	0	3223	35	3270	26
nsthetics	471	0	18	20	1	510	7
google	50	1	12	179	39	281	1
denise_mcallister	1	0	11	10	7	29	8
hedgewik	13	2	34	1	2	52	7
thecommunistshavethemusic	97	0	0	70	0	167	12
mediabritaintelegram	4	0	0	0	0	4	9
defendfinland	944	3	135	176	19	1277	7
thepatriotsunion	796	82	857	314	77	2126	9
hkstandstrong_promo_int	129	6	2	1245	4	1386	5
hongkongfp	0	12	4	0	3	19	5
reapernewsandmedia	2991	0	853	0	0	3844	9
qassambrigades	108	0	0	19	0	127	9
qabasat2018	40	0	0	1	0	41	9
ebaa0news	0	0	0	264	0	264	12
sonnyssupporters	186	0	0	9	0	195	9
memekai	196	0	37	22	5	260	4
boredboredbored	50	86	21	382	60	599	21
hknewseng	117	7	1	1609	3	1737	5
antifajokes	4488	75	728	5467	624	11382	22
nsmusicarchives	640	0	123	0	0	763	7
goodmems	1401	22	230	489	49	2191	4
spiritual_warriors	142	1	19	36	6	204	7
animeitaly	3060	254	594	4713	495	9116	21
furrifurri	1118	15	220	450	45	1848	4
bestimeline	154	136	136	571	303	1300	12
cremedelakek	1082	104	266	1557	226	3235	21
visumpopuli	560	7	422	116	49	1154	7
maxsmemes	34	0	0	5	0	39	4
painfullyrelatable	119	8	69	191	77	464	4
dixieforever	273	13	190	76	29	581	7
stopthebias	601	71	554	638	321	2185	8
muslimmemes	0	0	0	0	0	0	4
europeantunes	25	0	0	20	0	45	7
resistingreality	292	6	216	118	13	645	9
sailearsboat	12874	79	2168	4980	706	20807	4
azzinc	919	81	181	1466	178	2825	21
tangerines	1284	193	308	2493	257	4535	21
verynormalshitpost	17	32	42	45	46	182	4
okgoogleee	851	89	446	713	187	2286	21
futashit	575	24	22	1063	23	1707	21
xenoleft	135	6	58	140	27	366	12
ratherripped	2354	185	679	1911	190	5319	21
feministstuff	102	0	18	8	2	130	12
ebanistikachat	1988	495	357	20493	2665	25998	22
revolutionarybooks	249	1	25	67	4	346	12
etnosism	770	2	16	198	1	987	7
personalredpill	313	85	222	380	95	1095	4
hrctel	102	0	0	19	0	121	7
shill_tactics	148	94	289	148	59	738	4
sig_archive	11	39	45	35	25	155	4
geekschannel	623	108	84	2218	189	3222	12
programmerjokes	290	11	74	142	23	540	4
ueqstions	27	0	9	39	13	88	4
clownworldassociation	16	16	27	39	14	112	4
tennesseepb	12	2	14	44	8	80	8
catholicgroyper	59	0	1	116	0	176	7
tfowe88	28	0	0	5	0	33	7
rogerstonejr	3	0	0	12	0	15	8
lukesmemes	64	0	17	48	8	137	8
leftistbooks	15	0	0	3	0	18	12
broken_crayons	192	160	125	1006	407	1890	21
derangedbutdelightful	192	18	76	147	38	471	7
facebook	63	4	18	91	18	194	1
anarchisttech	177	0	28	32	3	240	12
jacobwohl	0	0	7	0	1	8	7
another_hacker_news	15	0	0	6	0	21	12
sarcastic_society	193	0	0	197	0	390	4
barackobama	10	0	0	13	0	23	1
infowarsofficalchat	1919	128	2145	1629	1133	6954	9
tommytommytommy	2128	0	159	116	5	2408	9
jaxelisasubhuman	12	0	12	8	7	39	7
votewatchuk	3	0	0	0	0	3	9
oshaqaljana	0	32	0	2284	63	2379	27
rcet_v_g11n	28	0	19	0	0	47	9
galaxyverge	349	5	291	123	47	815	9
piersmorgan	5	0	0	15	0	20	1
styxhexenhammer666_fans	223	13	194	185	72	687	9
scholarofthefirstsin	835	380	708	2128	619	4670	7
drakeart	12	0	6	3	2	23	7
rupression	796	8	26	972	9	1811	22
cosechetrovo	825	28	122	886	71	1932	21
theshed	2113	99	382	1357	100	4051	21
ane_bald	997	117	529	554	124	2321	4
whitefrontbulgaria	138	0	34	22	5	199	7
puddingdump	64	0	0	11	0	75	4
renewedchristians	11	4	34	2	6	57	7
yalch	658	0	155	0	0	813	12
swines	643	447	712	2063	1378	5243	4
doggoch	91	58	36	313	50	548	12
snakessnakes	119	0	45	45	10	219	4
extinctionrebellion	214	20	30	669	52	985	12
beepboopboog	175	0	60	7	4	246	7
ptchan	192	86	36	2513	338	3165	17
h07725188	202	59	103	275	58	697	4
menezes	247	111	529	511	667	2065	12
derstuermer	59	40	95	60	20	274	4
nacionalsocialismo	633	208	279	1111	116	2347	4
officeofmike	54	1	27	50	16	148	8
zh_chat	82	39	35	736	288	1180	8
hegelianpissing	32	378	66	522	664	1662	19
r_ambien	0	2	10	0	9	21	4
r_disneyvacation	1428	35	52	2558	46	4119	12
therightcantmeme	3773	17	91	2658	40	6579	12
r_interestingasfuck	2223	25	44	3061	29	5382	12
r_mapporn	2067	13	67	2207	48	4402	12
r_damnthatsinteresting	2204	14	39	1614	15	3886	12
r_unexpected	266	5	55	334	44	704	12
r_jokes	38	0	0	6	0	44	12
datascientology	398	8	94	306	60	866	12
rhodesiaforever	43	0	2	28	4	77	7
godsavethesouth	18	0	0	2	0	20	7
britbasedpills	107	357	235	731	424	1854	7
neonwasteland	134	9	47	165	38	393	12
anemoia	35	6	0	249	4	294	17
germanyswar	47	0	0	1	0	48	7
lauraloomerfanclub	267	208	666	406	455	2002	8
shitdirtymarxistglobalistssay	50	74	136	150	219	629	7
randomcrapienjoy	60	0	19	54	26	159	4
ironmemes	103	13	54	86	22	278	4
occultsymbolism	1	0	0	0	0	1	3
anarquismoenpdf	3711	0	39	0	0	3750	12
superhappyfunamerica	27	0	1	24	1	53	8
owenfans	100	140	140	1336	799	2515	7
trrcomp	202	1	127	29	4	363	9
theinfernum	1842	93	813	648	119	3515	12
ufoalpopolo	503	16	198	182	36	935	12
postmoderncats	18	2	2	18	6	46	4
lutheranmaymaybase	61	13	27	170	54	325	4
leninstreet	1016	151	128	4798	374	6467	22
the_library_ii	114	5	2	2238	52	2411	1
petebuttigieg	3414	3	109	1678	48	5252	1
ewarren	8636	3	39	2394	9	11081	1
renegadetribune_chat	0	1	0	0	9	10	6
dailyraccs	42	0	0	49	0	91	4
epichaha	293	34	215	466	244	1252	4
nationalsocialistmovement88	2557	1	1346	101	23	4028	7
nationalsocialistmovement	200	0	18	9	1	228	7
avi_levi507	0	40	0	2190	86	2316	14
furryquotes	60	5	10	248	20	343	12
gavha944	11	0	18	0	0	29	9
poutlikeabandit	86	43	101	112	76	418	4
nsgreece	0	0	0	4	0	4	2
secretsources	2	0	0	7	0	9	9
nsdapfrance	0	2646	0	10496	5066	18208	2
warhippy	160	0	1	13	0	174	7
lvtrans	0	17	0	579	23	619	10
dennd	0	16	0	2538	39	2593	18
lgbtgrooup	847	0	34	149	6	1036	7
gayboyam	102	0	0	18	0	120	7
the_best_jewish_channel	0	18	0	6188	180	6386	18
trumprealnews	48	2	531	16	128	725	9
unitedfreepatriots	445	44	161	518	128	1296	8
sellnerteleinstagram	0	0	0	0	0	0	0
compactmagazin	0	0	0	0	0	0	0
friedrichlangberg	0	0	0	0	0	0	0
identitasgeneracio	0	0	0	0	0	0	0
fpoeinfo	0	0	0	0	0	0	0
telemalenki	0	0	0	0	0	0	0
gedenken1683	0	0	0	0	0	0	0
patricklenart	0	0	0	0	0	0	0
reconquistastmk	0	0	0	0	0	0	0
ibsteiermark	0	0	0	0	0	0	0
identitaererbot	0	0	0	0	0	0	0
kryptokompassde	0	0	0	0	0	0	0
kksupport1	0	0	0	0	0	0	0
brittpettibone	0	0	0	0	0	0	23
ruinsamong	0	0	0	0	0	0	0
romanmoeseneder	0	0	0	0	0	0	0
identitaerebewegungooe	0	0	0	0	0	0	0
identitaereaugsburg	0	0	0	0	0	0	0
ib_bayern	0	0	0	0	0	0	0
ibberlinbrandenburg	0	0	0	0	0	0	0
widerstand_d	0	0	0	0	0	0	0
ibbautzen	0	0	0	0	0	0	0
grenzsteiniggoerlitz	0	0	0	0	0	0	0
europastoechter120db	0	0	0	0	0	0	0
identitaereniedersachsen	0	0	0	0	0	0	0
migrationspaktstoppen	0	0	0	0	0	0	0
identitaereschwaben	0	0	0	0	0	0	0
1399638739	0	0	0	0	0	0	0
ibsachsen	0	0	0	0	0	0	0
patriotpeerdev	0	0	0	0	0	0	0
lindemannmda	0	0	0	0	0	0	2
do5steirer	0	0	0	0	0	0	0
do5oberoesterreicher	0	0	0	0	0	0	0
dieoesterreicher	0	0	0	0	0	0	0
ibsaar	0	0	0	0	0	0	0
jungeflamme	0	0	0	0	0	0	0
alma_zadic	0	0	0	0	0	0	0
tomradtkede	0	0	0	0	0	0	0
islamistenjaeger	0	0	0	0	0	0	0
ibrlp	0	0	0	0	0	0	0
altstadtrevoltebautzen	0	0	0	0	0	0	0
identitaerebewegunghamburg	0	0	0	0	0	0	0
do5wiener	0	0	0	0	0	0	0
pegidaoriginal	0	0	0	0	0	0	0
do5niederoesterreicher	0	0	0	0	0	0	0
do5burgenlaender	0	0	0	0	0	0	0
do5salzburger	0	0	0	0	0	0	0
do5kaerntner	0	0	0	0	0	0	0
do5tiroler	0	0	0	0	0	0	0
do5vorarlberger	0	0	0	0	0	0	0
ein_prozent)	0	0	0	0	0	0	0
tagesstimme)	0	0	0	0	0	0	0
stefanmagnet	0	0	0	0	0	0	0
freilichmagazin)	0	0	0	0	0	0	0
freilichmagazin	0	0	0	0	0	0	0
arcadimagazin	0	0	0	0	0	0	0
facebookde	0	0	0	0	0	0	0
sezession	0	0	0	0	0	0	0
zukunft_heimat	0	0	0	0	0	0	0
infokanal_muenzenmaier	0	0	0	0	0	0	0
arcadimusik	0	0	0	0	0	0	0
ibschleswigholstein	0	0	0	0	0	0	0
ygblog	0	0	0	0	0	0	0
ib_meckpomm	0	0	0	0	0	0	0
generationidentitaer	0	0	0	0	0	0	0
ibstuttgart	0	0	0	0	0	0	0
originem_ib	0	0	0	0	0	0	0
jungeuropa	0	0	0	0	0	0	0
bloody32_official	0	0	0	0	0	0	0
unser_ursprung	0	0	0	0	0	0	0
almansonacid	0	0	0	0	0	0	0
jouwatch	0	0	0	0	0	0	0
afdsalzgitter	0	0	0	0	0	0	0
fler	0	0	0	0	0	0	0
aadiskurs	0	0	0	0	0	0	0
shlomobbing)	0	0	0	0	0	0	0
jungepatriotenvg	0	0	0	0	0	0	0
unblogdplusbot	0	0	0	0	0	0	0
jungepatrioten	0	0	0	0	0	0	0
unblogdplus_bot	0	0	0	0	0	0	0
reblogd_bot	0	0	0	0	0	0	0
lukreta	0	0	0	0	0	0	0
alexanarchofeed	0	0	0	0	0	0	0
honigwabe	0	0	0	0	0	0	0
clips79	0	0	0	0	0	0	0
chrisaresofficial	0	0	0	0	0	0	0
fwgzg	0	0	0	0	0	0	0
tommyrobinsoncarshare	0	0	0	0	0	0	9
alternativenewsnetwork	0	0	0	0	0	0	9
aviyamini	0	0	0	0	0	0	9
fascistbook	0	0	0	0	0	0	9
ruptly	0	0	0	0	0	0	0
realtommyrobinson	0	0	0	0	0	0	0
1337553402	0	0	0	0	0	0	0
1152976902	0	0	0	0	0	0	0
salvininews	0	0	0	0	0	0	2
zgidtl	0	0	0	0	0	0	0
achgut_com	0	0	0	0	0	0	0
pi_news_net	0	0	0	0	0	0	0
bundschuh	0	0	0	0	0	0	0
1484282290	0	0	0	0	0	0	9
jadresden	0	0	0	0	0	0	0
geraldgrosz	0	0	0	0	0	0	0
fleschmob	0	0	0	0	0	0	0
fleschseinzelfaelle	0	0	0	0	0	0	0
anbandeln	0	0	0	0	0	0	0
manoeverkritik	0	0	0	0	0	0	0
flescharmee	0	0	0	0	0	0	0
radiodeutschlandeins	0	0	0	0	0	0	0
netzwerk1984	0	0	0	0	0	0	0
janichsupport_bot	0	0	0	0	0	0	0
voluntarismusarchiv	0	0	0	0	0	0	0
klimakanal	0	0	0	0	0	0	0
konterrevolution	0	0	0	0	0	0	0
insvensweltder	0	0	0	0	0	0	0
kandelkanal,	0	0	0	0	0	0	0
eosproject	0	0	0	0	0	0	0
deutschlandunddiewelt,	0	0	0	0	0	0	0
deutschlandmachtdichtlandkreiskn	0	0	0	0	0	0	0
deutschlandmachtdichtgruppe	0	0	0	0	0	0	0
deutschlandmachtdicht	0	0	0	0	0	0	0
msnbc	0	0	0	0	0	0	1
cnn	0	0	0	0	0	0	1
nshaviv	0	0	0	0	0	0	0
unzensiertkontaktbot	0	0	0	0	0	0	0
fridaysforhubraum	0	0	0	0	0	0	0
drrepstein	0	0	0	0	0	0	1
steinhoefel	0	0	0	0	0	0	0
terraherz	0	0	0	0	0	0	0
focusonline	0	0	0	0	0	0	0
welt	0	0	0	0	0	0	0
ntvde	0	0	0	0	0	0	0
tonline_news	0	0	0	0	0	0	0
spiegelonline	0	0	0	0	0	0	0
zeitonline	0	0	0	0	0	0	0
sternde	0	0	0	0	0	0	0
tagesspiegel	0	0	0	0	0	0	0
sz	0	0	0	0	0	0	0
fr	0	0	0	0	0	0	0
nickmonroe	0	0	0	0	0	0	8
fbi	0	0	0	0	0	0	1
inthematrixxx	0	0	0	0	0	0	8
shadygrooove!	0	0	0	0	0	0	8
chuckgrassley!	0	0	0	0	0	0	1
uzensiert	0	0	0	0	0	0	0
horstseehofer	0	0	0	0	0	0	0
georgeisenreich	0	0	0	0	0	0	0
sawasanchebli	0	0	0	0	0	0	0
robinhoodla1954	0	0	0	0	0	0	0
geheimnis_der_gesundheit	0	0	0	0	0	0	0
prisonplanet	0	0	0	0	0	0	23
qlobalchangeitalia	0	0	0	0	0	0	0
rt_com	0	0	0	0	0	0	4
realdougstewart	0	0	0	0	0	0	8
franklinleonard!	0	0	0	0	0	0	0
daniellarimer	0	0	0	0	0	0	0
jack	0	0	0	0	0	0	1
snowden	0	0	0	0	0	0	1
geheimnis_der_gesundheit🌱	0	0	0	0	0	0	0
newscompact	0	0	0	0	0	0	0
316exposure	0	0	0	0	0	0	0
nicolasmaduro	0	0	0	0	0	0	0
obianuju	0	0	0	0	0	0	0
wikileaks	0	0	0	0	0	0	4
breakingnlive	0	0	0	0	0	0	23
kephren23	0	0	0	0	0	0	0
gunnarkaisertv	0	0	0	0	0	0	0
1276941715	0	0	0	0	0	0	0
marcbernhard	0	0	0	0	0	0	9
fdg_kanal	0	0	0	0	0	0	0
ronaldglaeser	0	0	0	0	0	0	0
junge_freiheit	0	0	0	0	0	0	0
newspicker	0	0	0	0	0	0	0
der_volkslehrer	0	0	0	0	0	0	0
komisch	0	0	0	0	0	0	0
naomiseibt	0	0	0	0	0	0	0
q_channel_de	0	0	0	0	0	0	0
wisnewskitv	0	0	0	0	0	0	0
jasinna	0	0	0	0	0	0	0
journalisten_watch	0	0	0	0	0	0	0
bewussttv	0	0	0	0	0	0	0
konsequentfreioffiziell	0	0	0	0	0	0	0
polnewsnetworktelegram	0	0	0	0	0	0	4
kandelistueberall	0	0	0	0	0	0	0
neonrevolt	0	0	0	0	0	0	0
dfjinfo	0	0	0	0	0	0	0
whatsappzutelegram	0	0	0	0	0	0	0
1477401262	0	0	0	0	0	0	0
epochtimesdeutschland	0	0	0	0	0	0	0
ytbaudiobot_channel	0	0	0	0	0	0	0
rtintl	0	0	0	0	0	0	0
geheimnis_gesundheit	0	0	0	0	0	0	0
deutschlandunddiewelt	0	0	0	0	0	0	0
diebandbreite	0	0	0	0	0	0	0
daneos	0	0	0	0	0	0	0
nationalewochenschau	0	0	0	0	0	0	0
miazgamdb	0	0	0	0	0	0	0
nicoreloadvision	0	0	0	0	0	0	0
unplannedmovie-konto	0	0	0	0	0	0	0
freiheitsbewegung	0	0	0	0	0	0	0
mrlibertarian	0	0	0	0	0	0	22
konsequentfrei	0	0	0	0	0	0	0
efmagazin	0	0	0	0	0	0	0
hexdrop	0	0	0	0	0	0	0
wakeywakeyworld	0	0	0	0	0	0	8
owenbenjamincomedy	0	0	0	0	0	0	8
tolzin	0	0	0	0	0	0	0
anon_rah	0	0	0	0	0	0	0
1193626655	0	0	0	0	0	0	0
1359378336	0	0	0	0	0	0	1
saracarterdc	0	0	0	0	0	0	1
berniesanders	0	0	0	0	0	0	1
oliverhidwoh	0	0	0	0	0	0	8
neubertc	0	0	0	0	0	0	8
vmoon19	0	0	0	0	0	0	8
abshirdsm	0	0	0	0	0	0	8
derekmenges	0	0	0	0	0	0	8
vicentennial	0	0	0	0	0	0	8
rouell3	0	0	0	0	0	0	8
jessicalburbank	0	0	0	0	0	0	8
jameelajamil	0	0	0	0	0	0	1
foxnewsyt	0	0	0	0	0	0	1
schoeneneuewelttt	0	0	0	0	0	0	0
beatrixvstorch	0	0	0	0	0	0	0
yoicenet2	0	0	0	0	0	0	0
gftv_hh)	0	0	0	0	0	0	0
rashidatlaib	0	0	0	0	0	0	1
elrondur1	0	0	0	0	0	0	0
twittersupport	0	0	0	0	0	0	25
expresszeitung_infobot!	0	0	0	0	0	0	0
impfkritischkanal	0	0	0	0	0	0	0
impfkritisch	0	0	0	0	0	0	0
outofthisworldnews	0	0	0	0	0	0	9
lionmediatelegram	0	0	0	0	0	0	0
breitbart	0	0	0	0	0	0	8
keinekinderrechtenimgg	0	0	0	0	0	0	0
efganidoenmez	0	0	0	0	0	0	0
trish_regan	0	0	0	0	0	0	1
digitalchronist)	0	0	0	0	0	0	0
fridaysforhubraumkanal	0	0	0	0	0	0	0
bjoernhoecke	0	0	0	0	0	0	0
gunnarkaiser	0	0	0	0	0	0	0
teamyoutube	0	0	0	0	0	0	9
expresszeitung_bot	0	0	0	0	0	0	0
pepelib	0	0	0	0	0	0	7
tradpics	0	0	0	0	0	0	4
twittervid_bot	0	0	0	0	0	0	7
erbaulichezitate	0	0	0	0	0	0	0
telefon_tube	0	0	0	0	0	0	0
schwarzefahneog	0	0	0	0	0	0	0
aktionen	0	0	0	0	0	0	0
silberjunge	0	0	0	0	0	0	0
flugblaetter	0	0	0	0	0	0	0
suedtirolerfreiheit	0	0	0	0	0	0	0
dions_telegram	0	0	0	0	0	0	0
zdf	0	0	0	0	0	0	0
lepettre	0	0	0	0	0	0	0
ralf_stegner	0	0	0	0	0	0	0
twitchde	0	0	0	0	0	0	0
youtube	0	0	0	0	0	0	1
mcdonalds	0	0	0	0	0	0	0
alice_weidel	0	0	0	0	0	0	0
wdr	0	0	0	0	0	0	0
schirdewan	0	0	0	0	0	0	0
christianschaft	0	0	0	0	0	0	0
susannehennig	0	0	0	0	0	0	0
polizeithueringen	0	0	0	0	0	0	0
grünen-spitze	0	0	0	0	0	0	0
gutmenschenkeule	0	0	0	0	0	0	0
svenstechtipps	0	0	0	0	0	0	0
pboehringer	0	0	0	0	0	0	0
smmeinungsfrei	0	0	0	0	0	0	0
heikoschrang	0	0	0	0	0	0	0
deutsche_patrioten_tv	0	0	0	0	0	0	0
teamheimatchat	0	0	0	0	0	0	0
myriam_stimme_von_kandel	0	0	0	0	0	0	0
carstenjahn	0	0	0	0	0	0	0
alternativemedien	0	0	0	0	0	0	0
gesundheitsecke	0	0	0	0	0	0	0
jahnteam	0	0	0	0	0	0	0
diewahrheitnurdiewahrheit	0	0	0	0	0	0	0
joinchata26q1i0snpnoohb9lszq	0	0	0	0	0	0	0
paulapcay	0	0	0	0	0	0	0
demokratie_und_gg_verteidigen	0	0	0	0	0	0	0
tinetebo	0	0	0	0	0	0	0
pressecop24	0	0	0	0	0	0	0
einsamerwanderer2019	0	0	0	0	0	0	0
patriotontourinfo	0	0	0	0	0	0	0
dannytastisch	0	0	0	0	0	0	0
new_militarycolumnist	0	0	0	0	0	0	2
hermannsland	0	0	0	0	0	0	0
svenliebichvideos	0	0	0	0	0	0	0
biundrepinfokanal	0	0	0	0	0	0	0
robertfranznaturheilkunde	0	0	0	0	0	0	0
gruppenliste	0	0	0	0	0	0	0
dortmundsrechte	0	0	0	0	0	0	0
dawidsnowden	0	0	0	0	0	0	0
revolutionart	0	0	0	0	0	0	0
derdritteweg	0	0	0	0	0	0	0
illuminati_news_tv	0	0	0	0	0	0	0
vegetarisch	0	0	0	0	0	0	0
voelkischer_aufklaerer	0	0	0	0	0	0	0
netzradiogermania	0	0	0	0	0	0	0
rustag1913gs	0	0	0	0	0	0	0
kdn2013	0	0	0	0	0	0	0
rebelrecordscb	0	0	0	0	0	0	7
dr_colly_light	0	0	0	0	0	0	0
svenswelt	0	0	0	0	0	0	0
dierechteinfo	0	0	0	0	0	0	0
deutschlandblatt	0	0	0	0	0	0	0
nationalanarchistnetwork	0	0	0	0	0	0	0
weden_asatru_kanal	0	0	0	0	0	0	0
patrioten_vs_migranten	0	0	0	0	0	0	0
derdritteblickwinkel	0	0	0	0	0	0	0
henrykstoe	0	0	0	0	0	0	0
ducanemisri	0	0	0	0	0	0	0
weden_astaru_kanal	0	0	0	0	0	0	0
nsheute	0	0	0	0	0	0	0
fsnrev	0	0	0	0	0	0	0
checkrestrictionbot	0	0	0	0	0	0	0
matthiasniebel	0	0	0	0	0	0	0
germanischergeistderfreiheit	0	0	0	0	0	0	0
wwwnetzradiogermaniade	0	0	0	0	0	0	0
qlobalgreen	0	0	0	0	0	0	0
encausee	0	0	0	0	0	0	0
buecherkiste	0	0	0	0	0	0	0
deutscherpatriot	0	0	0	0	0	0	0
fridaysforfuture	0	0	0	0	0	0	0
waternixe	0	0	0	0	0	0	0
join_platt_form_now	0	0	0	0	0	0	0
unzensier	0	0	0	0	0	0	0
impfkritik	0	0	0	0	0	0	0
veganpowerkanal	0	0	0	0	0	0	0
nslkanal	0	0	0	0	0	0	2
putin_fanclub	0	0	0	0	0	0	0
boon_news	0	0	0	0	0	0	0
dragontara	0	0	0	0	0	0	0
harald	0	0	0	0	0	0	0
patriotenimwiderstand	0	0	0	0	0	0	0
wjatscheslawseewald	0	0	0	0	0	0	0
lochindermatrix	0	0	0	0	0	0	0
germanischergeistderfrei	0	0	0	0	0	0	0
unzenziert	0	0	0	0	0	0	0
nno	0	0	0	0	0	0	0
\{']['	0	0	0	0	0	0	0
unzemsiert	0	0	0	0	0	0	0
liebertotalsrot	0	0	0	0	0	0	0
gegendasvergessen107	0	0	0	0	0	0	0
david	0	0	0	0	0	0	0
humor	0	0	0	0	0	0	0
inzensiert	0	0	0	0	0	0	0
rolanddellago	0	0	0	0	0	0	0
unsensiert	0	0	0	0	0	0	0
unzendiert	0	0	0	0	0	0	0
rentenkasse	0	0	0	0	0	0	0
clip	0	0	0	0	0	0	0
flache	0	0	0	0	0	0	0
bibel	0	0	0	0	0	0	0
nasa	0	0	0	0	0	0	1
video	0	0	0	0	0	0	0
vimeo	0	0	0	0	0	0	0
unsenziert	0	0	0	0	0	0	0
rothschild	0	0	0	0	0	0	0
pdf	0	0	0	0	0	0	0
videobotschaft	0	0	0	0	0	0	0
wahlbeobachterwatschdog	0	0	0	0	0	0	0
erfurtzeigtgesicht	0	0	0	0	0	0	0
stichwortsuchetelegram	0	0	0	0	0	0	0
bumperbuggy	0	0	0	0	0	0	0
siegdeslichts	0	0	0	0	0	0	0
revolutionartschat	0	0	0	0	0	0	0
frankkraemer	0	0	0	0	0	0	0
akashatv	0	0	0	0	0	0	0
holzwerken	0	0	0	0	0	0	0
thingkreisthemar	0	0	0	0	0	0	0
odysseus108	0	0	0	0	0	0	0
horstmahler	0	0	0	0	0	0	0
npdbundesverband	0	0	0	0	0	0	0
jungerevolutioninfo	0	0	0	0	0	0	0
drk_2020	0	0	0	0	0	0	0
uncut_news	0	0	0	0	0	0	0
botederwahrheit	0	0	0	0	0	0	0
deutscheswarenhaus	0	0	0	0	0	0	0
klemens_kilic	0	0	0	0	0	0	0
ftaol	0	0	0	0	0	0	0
langeriii	0	0	0	0	0	0	0
unzensiertkontakt	0	0	0	0	0	0	0
erwachenmitmarcus	0	0	0	0	0	0	0
trinchentrilantula	0	0	0	0	0	0	0
dresden2020	0	0	0	0	0	0	0
djt_q_family_channel	0	0	0	0	0	0	0
donald_j_trump_q_family_germany	0	0	0	0	0	0	0
tommyfrenck	0	0	0	0	0	0	0
nebochanten_watch	0	0	0	0	0	0	0
fackshop	0	0	0	0	0	0	0
quasir	0	0	0	0	0	0	0
zeitgeschehen	0	0	0	0	0	0	0
1283108320	0	0	0	0	0	0	0
backwoodboys	0	0	0	0	0	0	0
digitalerchronist_allgemeinchat	0	0	0	0	0	0	0
afdchatgruppe	0	0	0	0	0	0	0
digitalerchronist_allgemeinchat,	0	0	0	0	0	0	0
kritik_und_anregungen	0	0	0	0	0	0	0
chatbeimdigitalenchronisten	0	0	0	0	0	0	0
officialdlive	0	0	0	0	0	0	0
norbertbolz	0	0	0	0	0	0	0
klemenskilic	0	0	0	0	0	0	0
bitchute	0	0	0	0	0	0	9
sophiepassmann	0	0	0	0	0	0	0
markus_krall	0	0	0	0	0	0	0
cdu	0	0	0	0	0	0	0
cducsubt	0	0	0	0	0	0	0
spdde	0	0	0	0	0	0	0
spdbt	0	0	0	0	0	0	0
csu	0	0	0	0	0	0	0
dielinke	0	0	0	0	0	0	0
die_gruenen	0	0	0	0	0	0	0
fdp	0	0	0	0	0	0	0
digitalerchronist	0	0	0	0	0	0	0
jokoundklaas	0	0	0	0	0	0	0
dc	0	0	0	0	0	0	0
carolinmatthie	0	0	0	0	0	0	0
franziska	0	0	0	0	0	0	0
helgelindh	0	0	0	0	0	0	0
kira	0	0	0	0	0	0	12
kaigniffke	0	0	0	0	0	0	0
hamed_samad	0	0	0	0	0	0	0
digitalerc	0	0	0	0	0	0	0
abaerbock	0	0	0	0	0	0	0
carenmiosga	0	0	0	0	0	0	0
ndr	0	0	0	0	0	0	0
ardde	0	0	0	0	0	0	0
ard_presse	0	0	0	0	0	0	0
attiladerhundi⁩	0	0	0	0	0	0	0
martinsellner4	0	0	0	0	0	0	0
wirfuerdeutschlandwfdev	0	0	0	0	0	0	0
addstickers	0	0	0	0	0	0	2
wir_schaffendas	0	0	0	0	0	0	0
heimatverliebt	0	0	0	0	0	0	0
1364153818	0	0	0	0	0	0	0
1167544101	0	0	0	0	0	0	0
1217803955	0	0	0	0	0	0	0
gagaland	0	0	0	0	0	0	0
libkonnewsletter	0	0	0	0	0	0	0
1246480970	0	0	0	0	0	0	0
libertyacademybot	0	0	0	0	0	0	0
expresszeitung_infobot	0	0	0	0	0	0	0
patriotenderzukunft	0	0	0	0	0	0	0
aboutfacts&truth	0	0	0	0	0	0	0
regsprecher	0	0	0	0	0	0	0
tipsypianobar	0	0	0	0	0	0	0
hubermdb	0	0	0	0	0	0	0
contracoma	0	0	0	0	0	0	0
s	0	0	0	0	0	0	0
dion	0	0	0	0	0	0	0
memesofliberty	0	0	0	0	0	0	0
trolls_of_vienna	0	0	0	0	0	0	0
recentrtv	0	0	0	0	0	0	0
freiauf	0	0	0	0	0	0	0
vonosterhal	0	0	0	0	0	0	0
[truncated: 51,297 more rows]
